# Supplementary material for: Driver pattern identification over the gene co-expression of drug response in ovarian cancer by integrating high throughput genomics data
Source: PubMed Central journal article supplement (PMC5700962; doi:10.1038/s41598-017-16286-5), 2017-11-23
Supplement: 41598_2017_16286_MOESM1_ESM.pdf [file 41598_2017_16286_MOESM1_ESM.pdf]

**Driver pattern identification over the gene co-expression of drug  
response in ovarian cancer by integrating high throughput genomics  
data  
(Supplementary Material)**

Xinguo Lu<sup>1</sup>, Jibo Lu<sup>1</sup>, Bo Liao<sup>1</sup>, Xing Li<sup>1</sup>, Xin Qian<sup>1</sup>, Keqin Li<sup>1,2</sup>

1) College of Computer Science and Electronic Engineering, Hunan University,  
Lushan Nan Rd., Changsha 410082, China, 2) Department of Computer  
Science, State University of New York, New Paltz, NY 12561, USA.

**S1 Table. initial modules list.**

| Modules | Genes                                                                                                                                                                                                                                                                                                                                                                                                                                                                                                                                                                                                                                                                                                                                                                                                                                                                                                                                                                                                                                                                                                                                                                                                                                                                                                                                                                                                                                                                                                                                                                                                                                                                                                                                                                                                                                                                                                                                                                                                                                                                                                                                     |
|---------|-------------------------------------------------------------------------------------------------------------------------------------------------------------------------------------------------------------------------------------------------------------------------------------------------------------------------------------------------------------------------------------------------------------------------------------------------------------------------------------------------------------------------------------------------------------------------------------------------------------------------------------------------------------------------------------------------------------------------------------------------------------------------------------------------------------------------------------------------------------------------------------------------------------------------------------------------------------------------------------------------------------------------------------------------------------------------------------------------------------------------------------------------------------------------------------------------------------------------------------------------------------------------------------------------------------------------------------------------------------------------------------------------------------------------------------------------------------------------------------------------------------------------------------------------------------------------------------------------------------------------------------------------------------------------------------------------------------------------------------------------------------------------------------------------------------------------------------------------------------------------------------------------------------------------------------------------------------------------------------------------------------------------------------------------------------------------------------------------------------------------------------------|
| Module1 | <p>FBXO11;SLC26A6;KEL;ZBTB2;TFF1;CCBL1;SHD;F2;SCML2;THOP1;ADAR;PDE2A;NOX5;ITGB7;MYL4;RBL2;ENO3;GATA1;HBE1;PGC;ADAM23;RAB5A;APOB;NFE2L2;VGF;GALK1;TF;SPANXC;RHBG;RNF6;PGAP1;RHAG;PRH2;SERPIND1;DCT;ZNF620;DNNT;APOM;ASGR2;ZP1;KLF1;HBG1;APOA2;NCOA2;YES1;GYPC;NME4;DOT1L;CLTCL1;SERPIN1;AHSG;AMBP;SIX6;PRODH2;FGG;CGA;APOC3;HEMGN;NPTX1;SLC7A3;WNK4;KIAA1279;CES1;MLANA;RPS4Y2;C6orf141;TM4SF5;DUSP13;RBP4;PLAC4;ALAS2;ALB;JRKL;GATA3;CPNE7;ABCC2;MAGEA12;TFDP3;SOAT2;ALDOC;GDF3;WFDC2;CA5A;SERPINA7;MAGEA3;GDAP1L1;GPX2;POU5F1;ARID3A;HSPH1;DSCAM;RHOXF2B;ITIH3;PCKSK9;RPS4Y1;CTSG;CPS1;BCAS1;AFP;AZGP1;EEF1A2;SPANXD;C4BPB;SPTA1;TYR;CPLX2;TTR;COX7A1;ISLR;ITIH2;APOH;IGFBP1;DPPA4;HBG2;C1orf64;ORM1;ORM2;TXLNB;FABP7;FABP1;PRSS3;L1TD1;FGL1;AGT;HSD17B2;CSAG1;PRSS2;MYL7;UTS2;CXorf48</p>                                                                                                                                                                                                                                                                                                                                                                                                                                                                                                                                                                                                                                                                                                                                                                                                                                                                                                                                                                                                                                                                                                                                                                                                                                                                                                                                               |
| Module2 | <p>EFCAB4B;CNNM3;OTX2;PNPLA7;STAT5B;DAZ2;SHBG;APBB1;MAP1A;PTK2B;ADAMTSL5;ZBTB10;LZTR1;XYLB;MADD;DAZ1;PCBP3;COPS7A;VWF;DDX6;MED17;CORO7;SV2A;DOHH;MIXL1;EIF2AK3;FBXL18;HEPACAM;ALG12;G6PD;CCL1;S100Z;ADAD2;KCNK1;PRPF19;RND2;NTRK1;PIAS4;LIM2;MPP2;NEK4;CREB3L3;DUSP9;HS3ST4;ZNF19;BRSK2;DFNB31;FXD2;SPN;OSGIN1;PSG8;BAAT;NRIP3;LSM11;PSG4;CXorf23;F11;GNB3;IRX1;RASL10B;CNTNAP1;RIOK3;PKMYT1;CSNK1A1L;USP38;MASP2;TTY13;AADACL4;FGFR4;TTN;C5orf38;LRRC4B;CHST13;HAR1A;FAM123A;ACSM2A;CCL16;SLC22A2;FGA;HILS1;SYDE1;CLDN15;WSCD1;STRN3;GNG13;SERPINF2;GPR63;CYGB;EXOC6;ANGPTL3;RNF38;C1orf187;TPTE;CSF3;THEG;LOC283693;RSRY1;SLC8A3;EIF1AY;SLC9A5;AIFM3;CYP1A1;PKN3;ANKFN1;FSTL4;TPD52;CCR10;SPNS3;SYT3;KCNK6;ROBO4;SYN2;MEIS1;TAPT1;MDGA2;TNFSF9;PKLR;CRH;KIFC3;B4GALNT1;DDX3Y;OR5D13;GFI1B;FAM83G;PRDM9;TCEA1;RELL2;GCKR;RAB26;SLC39A5;ART4;NMNAT3;CDH9;GLYCTK;C2orf48;SMAD7;CETP;AMTN;SYNGR3;HRC;SOCS6;PAPPA;SFTPA1;CPN1;MAPK12;CORO6;HGFAC;PAX3;PBX1;SHC4;NLGN4Y;GGT6;KCNK12;LTB4R;ZDHHC22;SOX10;DLX1;CNTNAP4;TSGA10IP;MYPN;SCGB3A2;NR2E1;UPK1A;IL23R;RHD;CDH7;GLRA3;RALB;FTCD;ZNF488;APOA5;SLC5A11;NGFR;HSF4;AURKC;SLC2A2;RAET1E;RHEBL1;CCDC141;OR5111;C1orf61;SLC18A1;HYAL1;NDST4;OR1D2;PRTG;MYH2;C8B;CD34;ANKS4B;PROC;PRAMEF8;IGFBP1;SMAD4;MRGPRX3;SULT2A1;FUT5;USH1C;SMOC1;CALCR;MYOM3;PIWIL2;SYT6;SOX21;ZIM2;CYP2F1;MMRN2;KIAA1804;CACNA1H;GATA2;CDA;SERPINA4;PRODH;NOTUM;HBQ1;KLRC4;POU4F1;FSD1;TSPAN18;C3orf58;NKD1;TMEM171;PAH;PLP1;SLC30A10;MAGEB2;RLBP1;SLC17A2;PLA2G12B;XKR3;MAP2K7;SMCR5;SERPINA10;TRPV6;KRT34;F5;NOG;CLEC14A;TERT;FETUB;RAB3B;NR0B2;HAND1;IRF6;SLC38A5;CPA4;SERPINA11;SLC45A2;FAM9B;SLC30A3;GYPE;C8A;XPR1;TMEM145;SLC12A3;PTPRZ1;LCTL;BMP5;SERAC1;PRDM7;CLCA2;RNF138;WNT10B;CREG2;C8orf22;PTGFR;SULT2B1;DCX;MAPK4;KLB;HPD;MS4A3;NLRP11;CYP19A1;GALR1;ESX1;ADCY4;MYO1A;OR51B5;CDH1;SERPINA6;PRAP1;ISX;PAQR9;TRPM1;LXB2;DRD5;IGF2BP1;GCNT1;CHRNA9;PLAC2;CEACAM5;SPRR3;ADH4;SCGN;TLR5;KRTAP3-1;ARG1;KCNJ2;ACSM2B;KRTAP1-5;MIA2;XBP1;NEFM;SGPP2;DLX2;FGB;CDH4;C1orf210;SPINK4;MSMB;ABCC4;EMR1;BTLA;TFAP2B;VIL1;CPEB1;GABRB1;DQX1;NR1H4;ATP8B3;CLDN14;ALDH1A2;KCNE3;TRIM49;EFNB2;HOXC13;BLK;FGF19;NEFL;LOC</p> |

|         |                                                                                                                                                                                                                                                                                                                                                                                                                                                                                                                                                                                                                                                                                                                                                                                                                                                                                                                                                                                                                                                                                                                                                                                                                                                                                                                                                                                                                                                                                                                                                                                                                                                                                                                                                                                                                                   |
|---------|-----------------------------------------------------------------------------------------------------------------------------------------------------------------------------------------------------------------------------------------------------------------------------------------------------------------------------------------------------------------------------------------------------------------------------------------------------------------------------------------------------------------------------------------------------------------------------------------------------------------------------------------------------------------------------------------------------------------------------------------------------------------------------------------------------------------------------------------------------------------------------------------------------------------------------------------------------------------------------------------------------------------------------------------------------------------------------------------------------------------------------------------------------------------------------------------------------------------------------------------------------------------------------------------------------------------------------------------------------------------------------------------------------------------------------------------------------------------------------------------------------------------------------------------------------------------------------------------------------------------------------------------------------------------------------------------------------------------------------------------------------------------------------------------------------------------------------------|
|         | 441601;NDST3;GJA4;ODAM;TSPY2;PNLIPRP2;BTBD16;POU3F2;ONECUT1;TAC3;CHIT1;TMED6;GYPB;TYRP1;EGFL6;NPPB;DNER;TUBAL3;IRX2;LYVE1;SLC6A4;FOXG1;VIT;PRDM13;LRRTM1;LGR6;C16orf73                                                                                                                                                                                                                                                                                                                                                                                                                                                                                                                                                                                                                                                                                                                                                                                                                                                                                                                                                                                                                                                                                                                                                                                                                                                                                                                                                                                                                                                                                                                                                                                                                                                            |
| Module3 | PRKG1;OXT;MEIS3;VAT1;ILK;SLC2A14;HLX;ADAMTS16;KERA;SH3BGL3;SMPD1;MCHR1;BCAR1;NID1;VGLL3;EMP3;ELK3;KLF2;ACTC1;ALDH1B1;ID3;SLC12A4;LRRN3;EMILIN1;TFPI;ITGA5;OR7E24;ADAMTSL1;ETS1;ASGR1;CLEC3B;FHL3;GALNTL2;FAM126A;HAS1;HTR2A;XYLT1;TCP11L1;TLL1;CACNA1C;FEZ1;EHD2;CMTM3;C7orf10;CREB3L4;TPM1;PDLIM5;GPR68;CRISPLD2;SREBF1;KATNAL1;FSTL3;LATS2;RNF175;DGKI;CHSY1;PRND;MSC;TAS1R1;ZCCHC5;NKAPL;TGFB1I1;CBLN4;LIX1L;SLC22A3;F2RL2;TM4SF19;ZMAT3;SH3PXD2A;GREM2;SPOCD1;GPR1;EPHA2;IGFBP6;ELL2;TNC;EFEMP2;MGC45800;DACT3;FGF7;ACTA1;A1BG;SLC2A3;EXTL1;AQP1;RANBP3L;AKT3;ANGPTL2;SVEP1;CPNE8;CCL26;DOCK11;PMP22;NUAK1;GOLIM4;ANKRD29;THBS1;GFRA1;CNN2;PHLDA1;PPAPDC3;LMOD1;ZEB1;PSD3;FBN1;TRPA1;PLXNC1;PTRF;SLC16A7;ACAN;IGFBP4;FGF1;HSPB7;SERPINB7;FGF2;AFAP1;RBMS3;ENPP1;GRID1;GADD45B;MFS D4;DFNA5;RCAN1;AOC3;BDKRB1;PLXDC1;STX2;FOXF1;PTGER3;PROCR;COL8A1;ANTXR1;AK5;GALNT5;ECM1;OLFML3;RGS17;GNG11;TIAM2;SNAI1;DNAJB5;TGM2;TGFB I;APCDD1;VEGFC;GFPT2;PCOLCE;ANGPTL7;SPHK1;PDGFRA;ETV1;C16orf45;ZNF365;NBL1;TPM2;MEOX2;ODZ3;ISL1;ZNF215;PRKD1;COPZ2;PDZRN4;BACH2;RNF128;GAP43;FSTL1;NCAM2;THY1;HAND2;ADAMTSL3;LRRRC15;MAF;F2R;BMP4;PHLDB2;GHR;DEPDC7;CDH13;BASP1;PLAC9;FLNC;SPOCK1;BNC2;BAI3;BMP2;SEMA3C;SEMA3D;AEBP1;KCNE4;NT5E;TNFSF4;JAM2;TAGLN;ACTA2;NEXN;LSAMP;RGS16;PRRX1;TWIST1;VDR;ZFH4;HAS2;ST8SIA1;PDLIM3;CLSTN2;MXRA5;TMEM45A;CCDC80;SERPINE1;CNTN4;ADAM12;CDR1;GREM1;COL5A1;COL24A1;TIMP3;OMD;TPBG;EFEMP1;GDF6;GEM;NUDT11;SERPINF1;PLN;SALL4;CHRNA3;RGS2;OSR2;TBX18;DPT;FN1;IGF1;HS3ST2;EBF3;NUDT10;MAGEL2;ACTG2;ITGA11;ANGPTL1;SORCS2;STMN2;C1QTNF3;PDPN;PLAU;MFAP2;PEPF1;CH25H;MFAP4;MOXD1;CNN1;GAS1;SCG2;DSC3;COL5A2;BCHE;DKK1;CALB2;CILP;VCAN;CDH11;NDN;PDE1A;PPAPDC1A;DCN;ALPK2;SFRP1;CTHRC1;CCL11;SCRG1;COMP;LUM;HSPB3;ZNF521;INHBA;PTGIS;NNMT;THBS2;ITGBL1;GJB2;OGN;ASPN;SFRP4;IGFL2;LIX1;FAP;SFRP2;COL11A1;POSTN |
| Module4 | ATPAF2;FOXD4L1;GNG8;BTN2A1;CNIH2;PRKDC;OAZ2;MCAT;RFNG;HMG20B;GOLGA4;GOLGB1;PRKAR1B;TAOK2;PIP5K1C;ZRANB1;ERIGC2;FAM96B;CLDN17;DDX28;BSG;POLRMT;ARL2;NAPB;FAM43B;C19orf24;NDOR1;LDB1;TXNL4A;SPIRE2;WDR18;KLF14;FAM108A1;ATP9B;CEP192;ZNF131;NCL;ZNF391;YIPF3;PROKR1;HBM;UXS1;MAP3K4;KCNAB3;DIRAS1;C10orf137;MKNK2;BCL7C;MEX3C;HNF1A;NDUFS7;FGF22;PFKL;LMAN1;KLF16;IL17RC;SYNGR4;NUP153;SS18;FOXC2;PASK;CFDP1;ALDH5A1;FAM70B;TRIP12;ZNF182;SACS;PIGW;UTF1;ZNF135;ABCA7;ZNF784;IRX4;SF3A2;AMMECR1;PHKA1;C21orf56;SOX17;SOX8;PGF;GRIN2C;SPPL2B;ZNF75A;CHORDC1;P2RY4;SNX8;HCN2;SLC34A3;ISOC1;PFKFB4;TLX2;IAPP;ATAD3C;GNG7;FUS;TCEAL3;HNRNPA2B1;TCEAL6;MGC45922;FOX1;UCN;LIN7B;SLC4A8;HIRA;SLC22A18;ADRBK2;RNF145;TEPP;FBXL8;ITGB1BP3;CREBZF;CADM3;KCNMB3;FAIM3;AFG3L2;GPR151;KISS1R;SLC39A6;PGRMC1;MMP17;TM9SF2;ELMO3;GPR78;DOCK9;HAGHL;GPR20;PARD6A;MAFA;TCEAL5;ZSCAN10;CACNA1E;GAMT;GALNT9;LTC4S;AMH;HES7;C16orf74;FOX1;HRK;CRYAB;HIST1H4L;NRN1;CMBL;SCGB3A1;ADAMTS1                                                                                                                                                                                                                                                                                                                                                                                                                                                                                                                                                                                                                                                                                                                                                                                                                                                                  |
| Module5 | FBXO11;SLC26A6;KEL;ZBTB2;TFF1;CCBL1;SHD;F2;SCML2;THOP1;ADAR;PDE2A;NOX                                                                                                                                                                                                                                                                                                                                                                                                                                                                                                                                                                                                                                                                                                                                                                                                                                                                                                                                                                                                                                                                                                                                                                                                                                                                                                                                                                                                                                                                                                                                                                                                                                                                                                                                                             |

|          |                                                                                                                                                                                                                                                                                                                                                                                                                                                                                                                                                                                                                                                                                                                                      |
|----------|--------------------------------------------------------------------------------------------------------------------------------------------------------------------------------------------------------------------------------------------------------------------------------------------------------------------------------------------------------------------------------------------------------------------------------------------------------------------------------------------------------------------------------------------------------------------------------------------------------------------------------------------------------------------------------------------------------------------------------------|
|          | 5;ITGB7;MYL4;RBL2;ENO3;GATA1;HBE1;PGC;ADAM23;RAB5A;APOB;NFE2L2;VGF;GALK1;TF;SPANXC;RHBG;RNF6;PGAP1;RHAG;PRH2;SERPIND1;DCT;ZNF620;DNNT;APOM;ASGR2;ZP1;KLF1;HBG1;APOA2;NCOA2;YES1;GYPC;NME4;DOT1L;CLTCL1;SERPIN1;AHSG;AMBP;SIX6;PRODH2;FGG;CGA;APOC3;HEMGN;NPTX1;SLC7A3;WNK4;KIAA1279;CES1;MLANA;RPS4Y2;C6orf141;TM4SF5;DUSP13;RBP4;PLAC4;ALAS2;ALB;JRKL;GATA3;CPNE7;ABCC2;MAGEA12;TFDP3;SOAT2;ALDOC;GDF3;WFDC2;CA5A;SERPINA7;MAGEA3;GDAP1L1;GPX2;POU5F1;ARID3A;HSPH1;DSCAM;RHOXF2B;ITIH3;PCSK9;RPS4Y1;CTSG;CPS1;BCAS1;AFP;AZGP1;EEF1A2;SPANXD;C4BPB;SPTA1;TYR;CPLX2;TTR;COX7A1;ISLR;ITIH2;APOH;IGFBP1;DPPA4;HBG2;C1orf64;ORM1;ORM2;TXLNB;FABP7;FABP1;PRSS3;L1TD1;FGL1;AGT;HSD17B2;CSAG1;PRSS2;MYL7;UTS2;CXorf48                       |
| Module6  | NLRC5;CD226;PIK3CD;PPM1M;FCRL3;C7orf41;SH2B3;P2RX7;COTL1;RPS27L;CACNA2D4;CATSPER1;LAT2;CCL23;TNFRSF10C;BMP2K;HERPUD1;MYO5A;GPR114;EBI3;PFKM;DPEP2;LILRA2;KIAA0513;HGF;TNFSF12;IRF8;APOL4;CORO1A;CLEC7A;CD274;LGALS9;GAB3;HAMP;BTN3A3;LGALS12;TDRD7;SEMA6C;LILRB1;RAC2;APOC2;RAB32;PSMB10;CYB5R4;CSF1R;CCL3;LAX1;CHRNA6;GNG12;DENND1C;IL32;PAG1;PLEK2;CECR6;SPECC1;GNB4;MEF2C;ARRDC2;LY86;PTPRO;CD302;BTK;STAT1;RNASE2;IL21R;CD86;SNX10;CD33;ARNT2;HMHA1;OLR1;PNMT;VAV1;CCL4;CCL17;RNASE6;CCDC109B;VMO1;KCTD12;IGSF21;APBB1IP;CFD;FXD1;SAMSN1;EVI2B;FCGBP;CX3CR1;LY96;ANPEP;TPK1;APOC1;DAPP1;HLA-DQA1;CCL2;HLA-DQA2;IL18;FBXO32;BATF2;TNFSF10;CCL5;DDX25;EVI2A;DHRS9;CLEC2B;CCL8;IL15;GPX3;IL7;CCL18;GBP3;C10orf82;CD38;C3;CCL7;CCL13 |
| Module7  | ZNHIT3;ANKRD23;CENPT;ACTL6A;FXR1;DNAJC19;C6orf120;UNKL;MRPL47;OPA1;UBE2F;MUSTN1;PIK3CA;MFN1;SPCS2;MAD2L1BP;ZNF639;GMPS;C5orf22;LCAT;KPNA4;YIPF6;SENP2;RAB2A;RAB1A;ACSL3;DNAJB11;SLC33A1;PARL;WDFY1;ACVR1;TBL1XR1;GFM1;FNDC3B;SELS;NDUFA10;IER3IP1;SMC4;MYNN;RQCD1;MAGEF1;IMPAD1;NDUFB5;SERP1;TM2D3;PHACTR4;SSR1;PDCD10;PANK3;C3orf33;ZFH3;ARPM1;UBE2E1;TMEM30A;AP1S3;ECT2;B3GALNT1;EID3;MAGEH1;SERPINI1;FRK;GPR160                                                                                                                                                                                                                                                                                                                   |
| Module8  | C1orf201;CCDC104;CCDC113;LRRC27;C11orf74;HYDIN;TNFAIP8L1;C16orf48;ARL6;TEKT4;RFX2;WDR54;NEK10;GAS2L2;TEKT3;C1orf173;C22orf15;EFCAB2;CPXCR1;DUOX1;MNS1;DYX1C1;KCNE1;CACNG6;LRRC34;DNAH2;C8orf34;IQUB;CCDC17;LRRC46;RSPH10B;TSNAXIP1;TRIM55;LRRC48;CCDC89;CCDC135;DNAH10;ZNF214;STK33;WDR49;MEIG1;C10orf107;CCDC65;NME5;FAM92B;CXorf41;RGS22;TPPP3;SPATA4;C11orf70;C15orf26;ARMC4;C1orf114;AKAP14;WDR16;SRD5A2;C1orf87;DYNLRB2;TTC29;WDR69;ARMC3                                                                                                                                                                                                                                                                                       |
| Module9  | PRKCG;RPL23;FAM138F;RPL19;COPB2;HSPA5;MRTO4;AARS;CCL24;HGSNAT;DYNC1L2;PFDN5;NBP15;TUG1;F11R;MRPL45;DAZAP2;EHMT1;ZNF593;AP3D1;NLE1;GLG1;RPL12;HHLA1;RPS15;OMP;UBC;LCE3A;HSP90B1;TAS2R9;MED1;RPL23A;RPL6;LASP1;RPL32;MRPL1;NTHL1;RPL36A;ATP5D;MRPL54;RPL27;HABP4;RPS21;RPS15A;RPL38;RPS7;SEMA4D;GPHB5;LIAS;AFMID;DDR1;OR10A7;RPL31;NPM3;RPL36;RPL34;CHD3;PDHA1;RPL29;RPL24;STARD9;ANKRD2;TOMM7;CDKL3;RPL35A;BEST4;HSD11B1L;SPAM1;TLE1;HMGCS1;RPS18;RPL39;RPS3A;SLC27A5;SOX4;SHROOM2;TAF15;ZNF556                                                                                                                                                                                                                                       |
| Module10 | PSMD6;KIAA2026;CBWD5;EXOSC3;CBWD6;ARPC5L;ATP6V1G1;UBAP2;CDC37L1;SM                                                                                                                                                                                                                                                                                                                                                                                                                                                                                                                                                                                                                                                                   |

|          |                                                                                                                                             |
|----------|---------------------------------------------------------------------------------------------------------------------------------------------|
|          | C5;GLRX5;FAM122A;C9orf64;ZDHC21;FUNDC1;GINS3;KIAA0020;RBBP7;CBWD1;PAPDC2;DNAJA1;USP1;PIA1;RMI1;C9orf82;ERMP1;MTM1;NFIB;VLDLR                |
| Module11 | PER1;PPP1R15A;RHOB;KLF4;KLF6;NR4A1;EREG;JUNB;HBA2;NR4A3;CTGF;ATF3;HBD;DUSP1;ZFP36;CYR61;FOSB;FOS;EGR3;EGR1;IL6;EGR2;AREG                    |
| Module12 | HSP90AB1;CTNBL1;PSPC1;SMARCA1;TRADD;RSAD1;CKLF;CPNE1;WDR35;MT1X;PALM;MT2A;ASPHD1;MT1B;MT1G;MT1JP;LGALS2;MT1H;MT1M;MT1E;TFPI2                |
| Module13 | TAF12;POLR2E;AKR7A2;LDLRAP1;CDC34;AKR7A3;RGS19;RPS6KA1;AP1S1;CASP9;ARFRP1;TNIP2;HMGCL;ALDH4A1;WASF2;LYPLA2;TRAF7;RPL11;NOC2L;PABPC4;C1orf38 |
| Module14 | PRKRA;GGPS1;RBM34;DUSP12;C1orf131;FH;EGLN1;TOMM20;EXOC8;CD46;C1orf31;ZBTB7A;ARID4B;SCCPDH;CPOX;ADSS;TAF5L;ACBD3;TTC13;SRP9                  |
| Module15 | LYL1;MYO1G;ZAP70;GZMM;GNA15;SCO2;MATK;MFNG;KLRK1;CD8B;RAB33A;CD3D;CBFA2T3;BCL11B;KLRC2;KLRD1;KLRC3                                          |
| Module16 | IL1F10;WDR87;PIK3R5;OR4S1;MYH8;SLC10A1;PPM1F;SPZ1;ARHGAP22;VPS18;ZCHC13;CABP7;PCSK4;TEX12;CGB1;C9orf47                                      |
| Module17 | CHAF1A;YIF1B;CCNF;WDR62;MXD3;BCL2L12;PPIH;LMNB2;GTSE1;AURKB;CENPO;CDC20;GINS4;MGC21881;C1orf135;ZYG11A                                      |
| Module18 | BTBD2;GNA11;MAP2K2;DCTN1;PNPLA6;GTF2F1;ZNF358;PLD2;DUS3L;TRIP10;CBX6;NFIC;EEF2;MAN2B1;TIMM44;SH2D3A                                         |
| Module19 | ZNF707;PHF20L1;ZNF34;FAM91A1;HSF1;PUF60;ZNF7;CHRAC1;ZNF16;EXOSC4;SCRIB;TIGD5;PTP4A3;SQLE;C8orf51                                            |
| Module20 | ARMC6;FBXO24;TMEM161A;PGPEP1;CCDC124;DDX49;MAST3;UBA52;FAM125A;STX10;C19orf60;C19orf44;FBXW9;MAST1;RPL18A                                   |
| Module21 | JTB;UBFD1;FDPS;PEX19;FDPSL2A;PIGM;KARS;ATP6V0D1;ADAT1;MLYCD;SYNPO2L;ZNF689;CCNDBP1;PANK1                                                    |
| Module22 | RIN1;SERPINA1;ST3GAL1;CHI3L2;CYP24A1;VNN1;SAA4;HP;LRG1;PI3;SAA2;S100A9;SAA1;HPR                                                             |
| Module23 | MAGEA5;SSX5;SSX3;DSCR4;SSX2;SSX1;SSX7;MAGEA1;MAGEA10;MAGEA8;MAGEA11;DSCR8;MAGEA9                                                            |
| Module24 | CAMK1G;SLC4A4;WFDC1;PCSK6;GREB1;RBP7;LAMA2;GATM;CCDC48;DLK1;WNT2B;FOXL2;TSPAN8                                                              |
| Module25 | EXOSC9;IDH2;SNRPA1;POLG;FANCI;CENPE;GINS2;RAD51;DIAPH3;MND1;NEIL3;GGH;NMU                                                                   |
| Module26 | CCL15;MRAP;SCARA5;PI16;ASPA;ADH1B;PPARG;CD36;SV2B;PLA2G2A;TIMP4;FABP4                                                                       |
| Module27 | KRT80;KRT5;ANXA8L2;KRT6C;TGM1;KRT6B;GPR87;KRT6A                                                                                             |
| Module28 | HIST1H3A;SH3BP5L;H3F3A;RAB3GAP2;MIA3;B3GALNT2;PARP1;MCM3                                                                                    |
| Module29 | POLR3A;AKT1S1;RPL18;RPS11;RPL13A;RPL26;C17orf48;RPS24                                                                                       |
| Module30 | SAMD10;CRCT1;KRTAP5-8;MAB21L2;DIRC1;PRSS36;IL27                                                                                             |
| Module31 | HOXB4;HOXB7;HOXB3;HOXB5;HOXB2;HOXB8;HOXB6                                                                                                   |
| Module32 | SERGEF;GNB2L1;EIF3F;IPO7;RPS13;RPLP2;RPL27A                                                                                                 |
| Module33 | UGT2B4;UGT2A3;UGT2B10;CD200;UGT2B11;UGT2B7                                                                                                  |
| Module34 | PAGE1;COX7B2;PAGE5;MAGEC1;PAGE2;MAGEC2                                                                                                      |
| Module35 | ANKRD27;C19orf40;POP4;C19orf12;CCNE1;CDKN2A                                                                                                 |

|          |                                       |
|----------|---------------------------------------|
| Module36 | HOXA2;HOXA7;HOXA5;HOXA9;HOXA4         |
| Module37 | CD1B;CD1E;CD1C;S100B;CD1A             |
| Module38 | SNAPC2;TRAPPC5;NDUFA7;CD320;RPS28     |
| Module39 | SUPT16H;APEX1;METTL3;DAD1;PARP2       |
| Module40 | PCDHB15;PCDHB14;PCDHB8;PCDHB16;PCDHB5 |

**S2 Table. List of initial modulators for the mutation genes.**

|                                                                                                                                                                                                                                                                                                                                                                                                                                                                                                                                                                                                                                                                                                                                                                                                                                                                                                                                                                                                                                                                                                                                                                                                                                                                                                                                                                                                                                                                                                                                                                                                                                                                                                                                                                                                                                                                                                                                                                                                                                                                                                                                                                                                                                                                                                                                                                                                                                                                                                                                                                                                                                                                                                                                                                                                                                                                                                                                                                                                                                                                                        |
|----------------------------------------------------------------------------------------------------------------------------------------------------------------------------------------------------------------------------------------------------------------------------------------------------------------------------------------------------------------------------------------------------------------------------------------------------------------------------------------------------------------------------------------------------------------------------------------------------------------------------------------------------------------------------------------------------------------------------------------------------------------------------------------------------------------------------------------------------------------------------------------------------------------------------------------------------------------------------------------------------------------------------------------------------------------------------------------------------------------------------------------------------------------------------------------------------------------------------------------------------------------------------------------------------------------------------------------------------------------------------------------------------------------------------------------------------------------------------------------------------------------------------------------------------------------------------------------------------------------------------------------------------------------------------------------------------------------------------------------------------------------------------------------------------------------------------------------------------------------------------------------------------------------------------------------------------------------------------------------------------------------------------------------------------------------------------------------------------------------------------------------------------------------------------------------------------------------------------------------------------------------------------------------------------------------------------------------------------------------------------------------------------------------------------------------------------------------------------------------------------------------------------------------------------------------------------------------------------------------------------------------------------------------------------------------------------------------------------------------------------------------------------------------------------------------------------------------------------------------------------------------------------------------------------------------------------------------------------------------------------------------------------------------------------------------------------------------|
| <p>GOLIM4;KCNMB2;MRPL47;CCDC39;SERPINI1;WDR49;LOC646168;EGFEM1P;TNFSF10;MECOM;ECT2;SPATA16;NLGN1;TBL1XR1;ZMAT3;PIK3CA;ZNF639;USP13;PEX5L;PDCD10;MIR551B;MYNN;LRRC34;LRR1Q4;TERC;LRRC31;ARPM1;LOC100128164;SAMD7;GHSR;NAALADL2-AS3;MIR4789;KCNMB3;MFN1;GNB4;ACTL6A;NDUF5;TTC14;DNAJC19;FXR1;ASAP1;KCNQ3;PVT1;ADCY8;OC90;PHF20L1;TG;ST3GAL1;ZFAT;KHDRBS3;POU5F1B;LOC727677;MYC;MIR1204;MIR1205;MIR1207;MIR1206;MIR1208;LOC728724;GSDMC;EFR3A;HHLA1;LRRC6;HPYR1;TMEM71;NDRG1;ZFAT-AS1;MIR30B;MIR30D;LOC286094;FLJ43860;GPAA1;TCEA1;FBXO11;ARMC4;ZNF20;ZNF707;CDCA8;FARSA;ADCK5;ZNF527;TRPC4AP;JRKL;SDHA;ENDOD1;YTHDF3;LAPTM4A;FBXL6;WISP1;SLA;STK3;FAM91A1;EED;IFT52;ZNF345;ARFGAP1;TIGD5;HSF1;SAMD9L;FAM66E;DEFB103A;SPAG11B;DEFB103B;DEFB4B;SPAG11A;DEFB4A;LOC100132396;BANP;JPH3;ZCCHC14;KLHDC4;MYH10;STX8;SRCIN1;ACACA;LINC00324;NTN1;GAS7;USP43;MYH13;MYH4;HS3ST3A1;ADORA2B;KSR1;KRT18P55;RAD51L3-RFFL;CCL23;AP2B1;GAS2L2;SLFN11;MYO19;AATF;SYNRG;TADA2A;FBXL20;LOC100131347;CWC25;PLXDC1;FBXO47;PSMD3;WIPF2;ERBB2;IKZF3;ALOX15B;ALOX12B;GUCY2D;MIR4314;PER1;ALOXE3;TMEM107;AURKB;VAMP2;MIR3676;C17orf59;MIR4521;RANGRF;ARHGEF15;PFAS;ODF4;SLC25A35;CTC1;RPL26;KRBA2;NDEL1;LOC100128288;RNF222;CCDC42;MFSD6L;SPDYE4;PIK3R6;DHRS7C;RCVRN;GLP2R;MYH8;MYH1;CDRT15P2;MEIS3P1;TBC1D26;ZSWIM7;UBB;SMCR5;C17orf51;WSB1;MIR4522;TBC1D3P5;LGALS9;NOS2;PPY2;CCL7;CCL2;CCL8;CCL13;TMEM132E;C17orf102;ZNF830;CCT6B;RFFL;LIG3;SLC35G3;RAD51D;UNC45B;FNDC8;NLE1;SLFN5;SLFN13;SLFN12;SLFN12L;PEX12;SLFN14;SNORD7;RASL10B;C17orf50;TAF15;MMP28;C17orf66;CCL14;CCL15;RDM1;CCL14-CCL15;LYZL6;CCL3;CCL18;CCL3L1;CCL3L3;CCL4L2;CCL4L1;TBC1D3C;TBC1D3B;TBC1D3H;ZNHIT3;TBC1D3G;GGNBP2;PIGW;DHRS11;MRM1;LHX1;MIR2909;C17orf78;DUSP14;DDX52;TBC1D3F;LOC284100;TBC1D3;LOC40434;MRPL45;SOCS7;GPR179;ARHGAP23;C17orf96;PIP4K2B;PCGF2;PSMB3;CISD3;MIR4734;MIR4726;MLLT6;RPL23;SNORA21;LASP1;C17orf98;LOC100505576;MIR4727;FLJ43826;CACNB1;ARL5C;STAC2;RPL19;MED1;CDK12;STARD3;PPP1R1B;NEUROD2;PGAP3;PNMT;TCAP;MIEN1;MIR4728;GSDMB;LRRC3C;ZBPB2;GSDMA;ORMDL3;SNORD124;THRA;MED24;CSF3;NR1D1;MSL1;CASC3;RAPGEFL1;RARA;GJD3;CDC6;ANKRD24;GNA15;IZUMO4;ABCA7;RNF126;KISS1R;REXO1;CSNK1G2;DOT1L;TLE2;GNG7;CELF5;MFSD12;NFIC;ZBTB7A;MATK;STAP2;PLIN3;UBXN6;DPP9;THEG;PPAP2C;MIER2;TPGS1;ODF3L2;C2CD4C;MADCAM1;SHC2;GZMM;POLRMT;CDC34;BSG;HCN2;FGF22;PALM;C19orf21;PRSS57;FSTL3;PTBP1;AZU1;MED16;PRTN3;CFD;MIR3187;ELANE;LPPR3;MIR4745;R3HDM4;C19orf6;WDR18;CNN2;GRIN3B;ARID3A;HMHA1;SBNO2;POLR2E;GPX4;EFNA2;CIRBP;ATP5D;C19orf24;C19orf26;STK11;MIDN;CIRBP-AS1;MUM1;NDUFS7;DAZAP1;GAMT;RPS15;REEP6;PCSK4;MEX3D;C19orf25;PLK5;APC2;ADAMTSL5;TCF3;UQCR11;MBD3;ATP8B3;MIR1909;LOC100288123;ONECUT3;CSNK1G2-AS1;SCAMP4;ADAT3;MKNK2;MOB3A;BTBD2;AP3D1;C19orf35;JSRP1;PLEKHJ1;SPPL2B;MIR4321;OAZ1;LSM7;AMH;MIR1227;LINGO3;TIMM13;GADD45B;LMNB2;TMPRSS9;SLC39A3;DIRAS1;ZNF555;THOP1;SGTA;ZNF554;ZNF556;TLE6;ZNF57;ZNF77;GNA11;AES;S1PR4;NCLN;FZR1;DOHH;C19orf77;C19orf71;GIPC3;HMG20B;TBXA2R;C19orf29-AS1;TJP3;APBA3;MRPL54;RAX2;ZFR2;ATCAY;EEF2;PIAS4;SNORD37;MIR637;DAPK3;ITGB1BP3;CREB3L3;SIRT6;MAP2K2;EBI3;FSD1;SHD;T</p> |
|----------------------------------------------------------------------------------------------------------------------------------------------------------------------------------------------------------------------------------------------------------------------------------------------------------------------------------------------------------------------------------------------------------------------------------------------------------------------------------------------------------------------------------------------------------------------------------------------------------------------------------------------------------------------------------------------------------------------------------------------------------------------------------------------------------------------------------------------------------------------------------------------------------------------------------------------------------------------------------------------------------------------------------------------------------------------------------------------------------------------------------------------------------------------------------------------------------------------------------------------------------------------------------------------------------------------------------------------------------------------------------------------------------------------------------------------------------------------------------------------------------------------------------------------------------------------------------------------------------------------------------------------------------------------------------------------------------------------------------------------------------------------------------------------------------------------------------------------------------------------------------------------------------------------------------------------------------------------------------------------------------------------------------------------------------------------------------------------------------------------------------------------------------------------------------------------------------------------------------------------------------------------------------------------------------------------------------------------------------------------------------------------------------------------------------------------------------------------------------------------------------------------------------------------------------------------------------------------------------------------------------------------------------------------------------------------------------------------------------------------------------------------------------------------------------------------------------------------------------------------------------------------------------------------------------------------------------------------------------------------------------------------------------------------------------------------------------------|

MIGD2;CCDC94;SH3GL1;MPND;CHAF1A;MIR4746;PLIN4;LRG1;HDGFRP2;SEMA6B;PLIN5;C19orf10;TNFAIP8L1;LOC100131094;MIR7-3HG;TICAM1;FEM1A;MIR7-3;LOC100128946;XPNPEP3;FAM19A5;NFATC3;LOC283867;TMC07;PLA2G15;CDH1;SMPD3;ESRP2;SLC7A6;PRMT7;SLC7A6OS;HAS3;GGA1;TMEM184B;PLA2G6;TRIOBP;EIF3L;CBY1;DMC1;CACNA1I;CYTH4;ELFN2;CARD10;LGALS2;CDC42EP1;SH3BP1;LGALS1;NOL12;PDXP;ANKRD54;GCAT;MIR659;MIR658;H1F0;POLR2F;MICALL1;C22orf23;MIR4534;PICK1;BAIAP2L2;SLC16A8;MAFF;LOC400927;DDX17;KCNJ4;KDEL3;LOC646851;DNAL4;SUN2;GTPBP1;TOMM22;JOSD1;NPTXR;CBX6;APOBEC3B;APOBEC3A;APOBEC3C;APOBEC3D;APOBEC3F;CBX7;APOBEC3G;MGAT3;ATF4;SMCR7L;RPS19BP1;MYH2;SOX10;SLC12A3;FAM120B;PPP2R2A;LONP1;CAMK2D;CSNK1E;ASS1;GALR3;APOBEC3H;RB1;CCDC135;MFNG;C9orf82;SOSTDC1;RRM1;MT1M;SLC18A1;EIF4G3;XRCC4;KLF16;APOL6;PIP5K1C;WDR16;CCL1;VPS33B;LOXL2;FAM108C1;HPS4;C19orf29;DNAJC16;C1orf172;FGL1;TOP2A;GRB7;USP48;UBE4B;ZCCH9;SCAMP1;ZDHC21;RAB28;MSR1;CCL16;FAM108A1;CCL11;DOK2;CCL4;HES7;CCL5;DHRS4;MDN1;HIATL1;PIK3R5;HNF1B;NUP43;TCP1;C6orf120;ZNF500;SF3A2;PIWIL2;APOB;BRCA1;BRCA2;COL6A6;CSMD3;DNAH3;DNAH8;FLG2;HSPG2;HUWE1;KIAA1109;ODZ1;RZR2;SLCO1C1;STAB2;SYNE2;ZFHX4;NEB;RB1CC1;SCN8A;CREBBP;DST;FAT3;FLG;HMCN1;LRP1B;LRP2;MUC17;NF1;PTPRZ1;SORCS3;SPTB;TP53;TTN;UBR4;MT-ND4;USH2A;HYDIN;RYR1;MUC16;

**S3 Table. Modulator gene list after module network learning.**

| Modulator gene list |         |          |          |          |          |         |         |
|---------------------|---------|----------|----------|----------|----------|---------|---------|
| MT1M                | GOLIM4  | C1orf172 | AATF     | LMNB2    | C19orf24 | LRRC31  | RPS15   |
| LASP1               | JPH3    | ADAMTSL5 | MYC      | PALM     | TNFSF10  | HMG20B  | SOSTDC1 |
| AMH                 | SLC18A1 | HES7     | C6orf120 | FAM108A1 | TIGD5    | TLE2    | WSB1    |
| HNF1B               | UBE4B   | MRPL47   | POLRMT   | FAM91A1  | SOX10    | FBXO11  | KLF16   |
| PHF20L1             | SLFN13  | MYH2     | CDC34    | MED24    | TBL1XR1  | MFNG    | MYH8    |
| ARPM1               | CCL11   | HHLA1    | NDUFB5   | FGL1     | DOT1L    | MRM1    | MRPL54  |
| FSTL3               | PIK3R5  | CNN2     | C9orf82  | SBNO2    | CCL8     | ZNF707  | CCL7    |
| PDCD10              | CCL5    | GNA11    | CCL4     | KISS1R   | KCNMB3   | POLR2E  | MFN1    |
| FSD1                | ECT2    | CCL18    | GAS2L2   | CCL16    | FGF22    | RPL19   | WDR16   |
| SLC12A3             | CCL23   | C19orf10 | RCVRN    | SF3A2    | GADD45B  | RASL10B | WDR18   |
| CCDC135             | EEF2    | PLXDC1   | ARHGAP23 | GZMM     | LRG1     | PPP1R1B | TCAP    |
| BRCA1               | HYDIN   | APOB     | MUC16    | ZFHX4    |          |         |         |

**S4 Fig. List of dosage-sensitive and dosage-resistant genes and the scatter diagrams of these genes.** We applied a local polynomial regression fitting model with the R package loess to the scatter diagram for 93 regulatory genes with 324 samples. DS threshold is set to (-0.25,0.25) as the filtering criteria for dosage-sensitive genes(DSGs) and the others were selected as dosage-resistant genes(DRGs). Therefore, we obtained 44 DSGs and 49 DRGs (see Supplementary Fig. S4). The LRG1, HYDIN, POLRMT and TNFSF10 gene data scatter diagram for CNVs or somatic mutations vs. Gene expression with local polynomial regression fitting model are shown in Fig. 3 in our main manuscript, in which HYDIN is derived from somatic mutations. Each red point represents an independent sample, the black line is the linear regression result, and the blue curve is the local polynomial regression fitting result. In Fig. 3A and Fig. 3B the slope of the black lines are close to 0, so the dosage sensitivity score are nearly equal to 0. In Fig. 3C and Fig. 3D the

slope's absolute value of the black line are above 1, the blue curves are mostly overlapped with the black line, so the dosage sensitivity score are above 1. It can be concluded from the graph that the genes for Fig. 3A and Fig. 3B are dosage-resistant genes, whereas the genes for Fig. 3C and Fig. 3D are dosage-sensitive genes. Here, we list another 10 scatter diagrams(related gene list: ADAMTSL5, APOB, ARHGAP23, ARPM1, AZU1, BRCA1, C19orf10, C19orf24, C1orf172 and C6orf120) of these 93 genes.

**Relationship between gene expression & CNV**

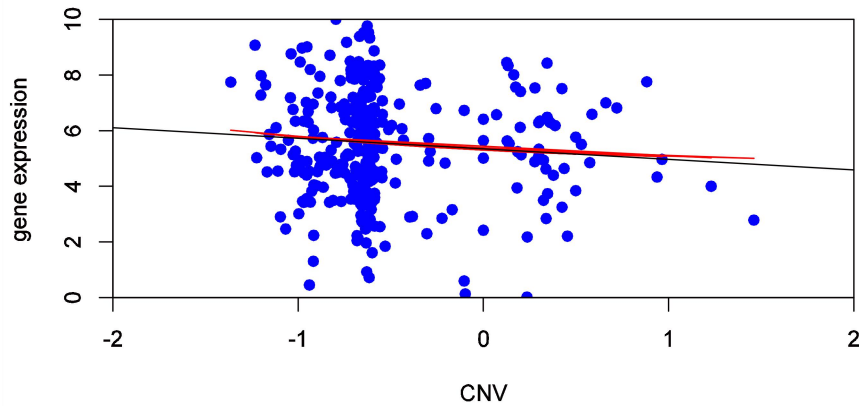

**Relationship between gene expression & SM**

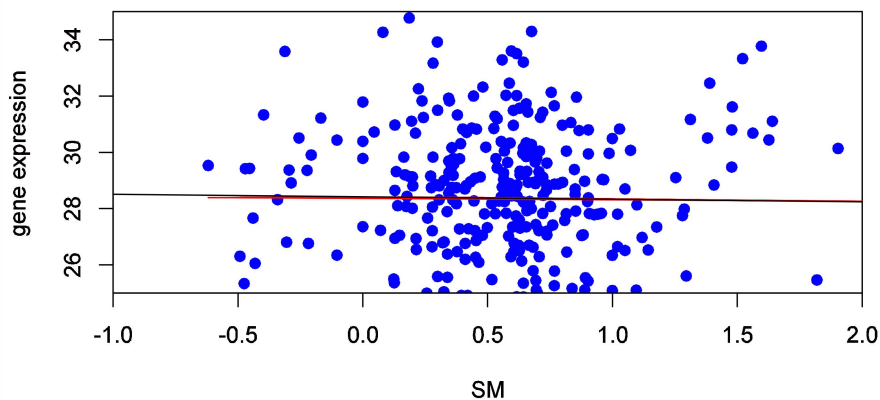



**Relationship between gene expression & CNV**

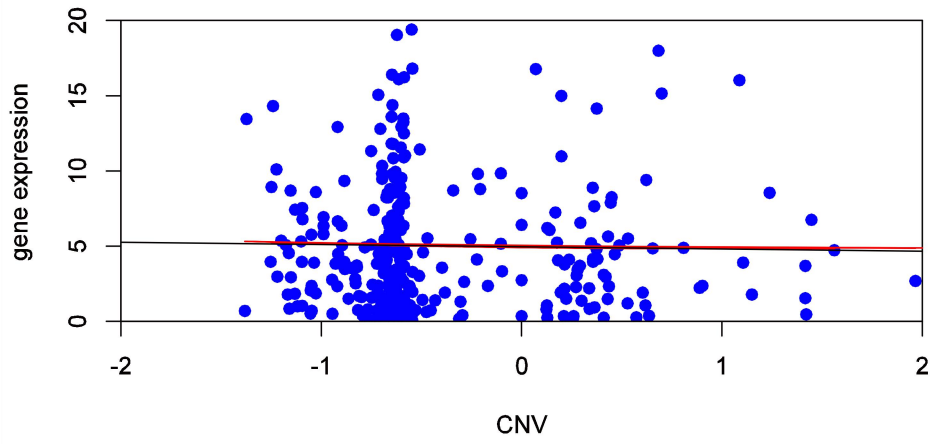

**Relationship between gene expression & CNV**

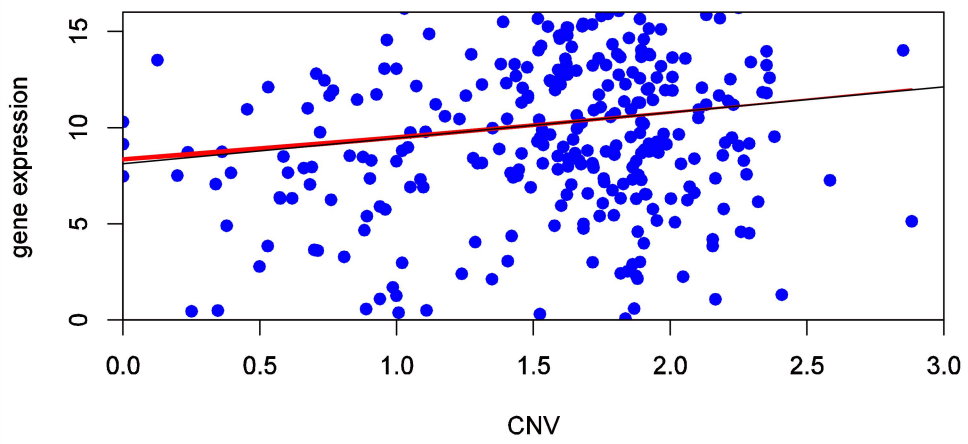

**Relationship between gene expression & cnv**

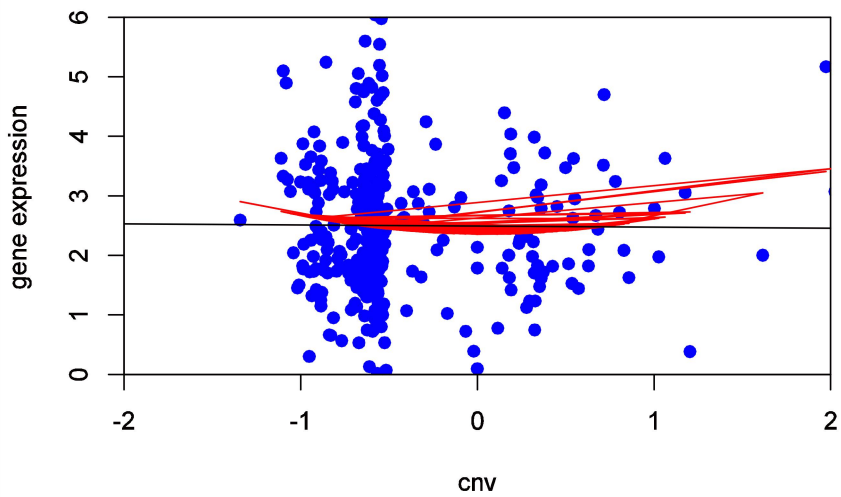

**Relationship between gene expression & SM**

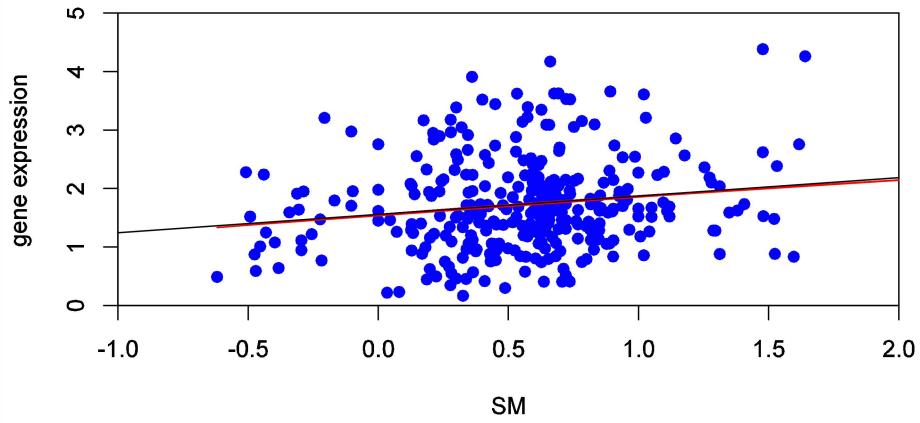

**Relationship between gene expression & CNV**

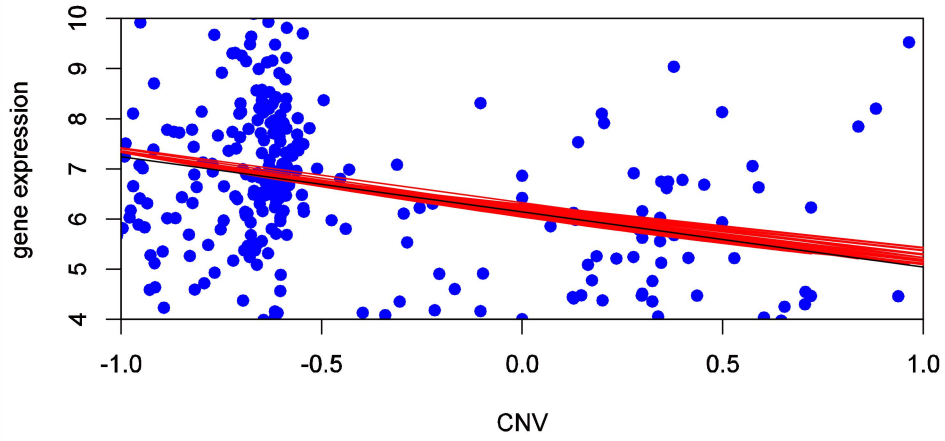

**Relationship between gene expression & CNV**

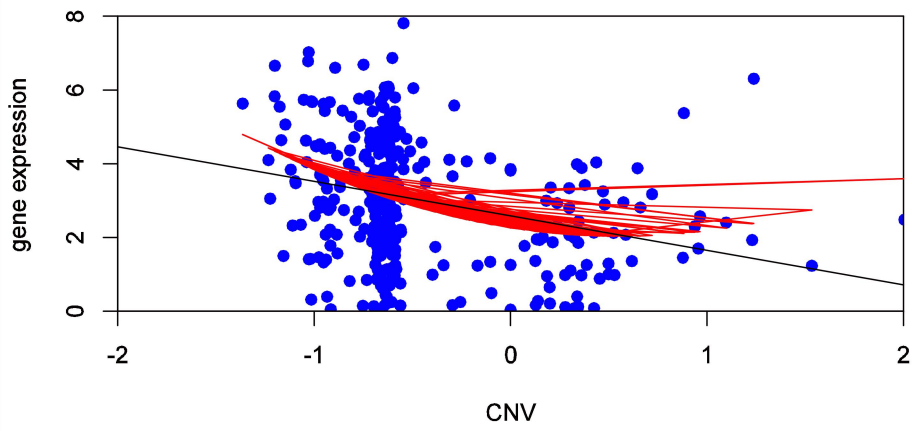

**Relationship between gene expression & CNV**

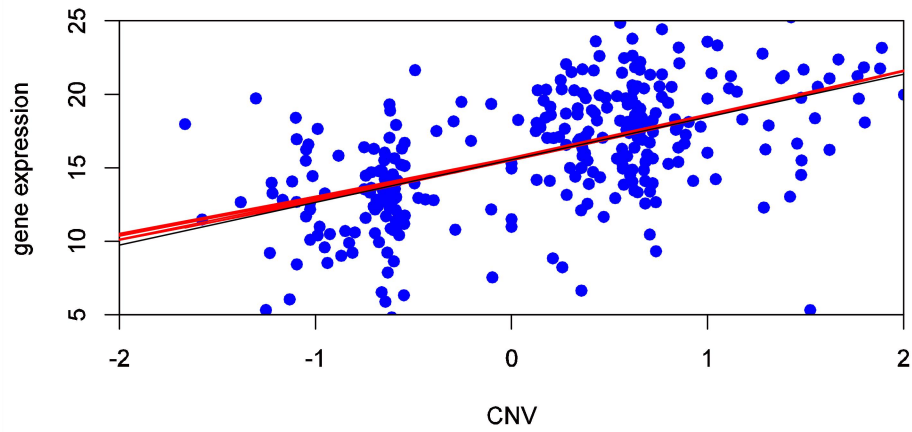

**Relationship between gene expression & CNV**

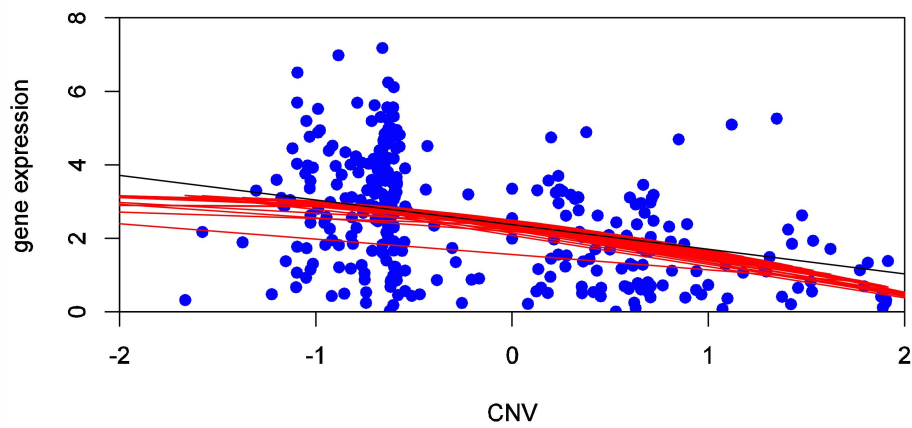

**S5 Table. The GO term pathways enriched by DRGs.**

| Pathway ID | Description           | Gene Ratio | BgRatio  | pvalue   | p. adjust | qvalue   | geneID                                                | Count |
|------------|-----------------------|------------|----------|----------|-----------|----------|-------------------------------------------------------|-------|
| G0:0048247 | lymphocyte chemotaxis | 6/40       | 55/16672 | 3.43E-09 | 2.51E-06  | 2.12E-06 | CCL11/<br>CCL16/<br>CCL18/<br>CCL23/<br>CCL8/<br>CCL5 | 6     |
| G0:0002548 | monocyte chemotaxis   | 6/40       | 58/16672 | 4.76E-09 | 2.51E-06  | 2.12E-06 | CCL11/<br>CCL16/<br>CCL18/<br>CCL23/<br>CCL8/<br>CCL5 | 6     |
| G0:007     | mononu                | 6/40       | 73/166   | 1.95E-   | 6.86E-    | 5.80E-   | CCL11/                                                | 6     |

|                |                                      |      |               |              |              |              |                                                                |   |
|----------------|--------------------------------------|------|---------------|--------------|--------------|--------------|----------------------------------------------------------------|---|
| 1674           | clear cell migration                 |      | 72            | 08           | 06           | 06           | CCL16/<br>CCL18/<br>CCL23/<br>CCL8/C<br>CL5                    |   |
| G0:007<br>0098 | chemokine-mediated signaling pathway | 6/40 | 80/166<br>72  | 3.40E-<br>08 | 6.95E-<br>06 | 5.87E-<br>06 | CCL11/<br>CCL16/<br>CCL18/<br>CCL23/<br>CCL8/C<br>CL5          | 6 |
| G0:007<br>2676 | lymphocyte migration                 | 6/40 | 81/166<br>72  | 3.67E-<br>08 | 6.95E-<br>06 | 5.87E-<br>06 | CCL11/<br>CCL16/<br>CCL18/<br>CCL23/<br>CCL8/C<br>CL5          | 6 |
| G0:003<br>0593 | neutrophil chemotaxis                | 6/40 | 82/166<br>72  | 3.95E-<br>08 | 6.95E-<br>06 | 5.87E-<br>06 | CCL11/<br>CCL16/<br>CCL18/<br>CCL23/<br>CCL8/C<br>CL5          | 6 |
| G0:007<br>1347 | cellular response to interleukin-1   | 6/40 | 85/166<br>72  | 4.91E-<br>08 | 7.40E-<br>06 | 6.25E-<br>06 | CCL11/<br>CCL16/<br>CCL18/<br>CCL23/<br>CCL8/C<br>CL5          | 6 |
| G0:199<br>0266 | neutrophil migration                 | 6/40 | 88/166<br>72  | 6.05E-<br>08 | 7.40E-<br>06 | 6.25E-<br>06 | CCL11/<br>CCL16/<br>CCL18/<br>CCL23/<br>CCL8/C<br>CL5          | 6 |
| G0:009<br>7529 | myeloid leukocyte migration          | 7/40 | 151/16<br>672 | 6.31E-<br>08 | 7.40E-<br>06 | 6.25E-<br>06 | CCL11/<br>CCL16/<br>CCL18/<br>CCL23/<br>CCL8/C<br>CL5/AZ<br>U1 | 7 |

|                |                                            |      |           |          |          |          |                                                                         |   |
|----------------|--------------------------------------------|------|-----------|----------|----------|----------|-------------------------------------------------------------------------|---|
| G0:007<br>1621 | granulocyte chemotaxis                     | 6/40 | 97/16672  | 1.09E-07 | 1.11E-05 | 9.41E-06 | CCL11/<br>CCL16/<br>CCL18/<br>CCL23/<br>CCL8/<br>CL5                    | 6 |
| G0:007<br>1356 | cellular response to tumor necrosis factor | 8/40 | 250/16672 | 1.16E-07 | 1.11E-05 | 9.41E-06 | APOB/<br>CL11/<br>CL16/<br>CL18/<br>CL23/<br>CL8/<br>CCL5/<br>BRC<br>A1 | 8 |
| G0:009<br>7530 | granulocyte migration                      | 6/40 | 106/16672 | 1.84E-07 | 1.61E-05 | 1.36E-05 | CCL11/<br>CCL16/<br>CCL18/<br>CCL23/<br>CCL8/<br>CL5                    | 6 |
| G0:003<br>4612 | response to tumor necrosis factor          | 8/40 | 268/16672 | 1.98E-07 | 1.61E-05 | 1.36E-05 | APOB/<br>CL11/<br>CL16/<br>CL18/<br>CL23/<br>CL8/<br>CCL5/<br>BRC<br>A1 | 8 |
| G0:007<br>0555 | response to interleukin-1                  | 6/40 | 110/16672 | 2.30E-07 | 1.65E-05 | 1.40E-05 | CCL11/<br>CCL16/<br>CCL18/<br>CCL23/<br>CCL8/<br>CL5                    | 6 |
| G0:003<br>0595 | leukocyte chemotaxis                       | 7/40 | 183/16672 | 2.35E-07 | 1.65E-05 | 1.40E-05 | CCL11/<br>CCL16/<br>CCL18/<br>CCL23/<br>CCL8/<br>CL5/<br>AZ<br>U1       | 7 |
| G0:005<br>0729 | positive regula                            | 6/40 | 115/16672 | 2.99E-07 | 1.98E-05 | 1.67E-05 | CCL11/<br>CCL16/<br>CCL18/                                              | 6 |

|            |                                                      |      |           |          |             |             |                                         |   |
|------------|------------------------------------------------------|------|-----------|----------|-------------|-------------|-----------------------------------------|---|
|            | tion of inflammatory response                        |      |           |          |             |             | CCL23/CCL8/CL5                          |   |
| G0:0071346 | cellular response to interferon-gamma                | 6/40 | 138/16672 | 8.78E-07 | 5.46E-05    | 4.61E-05    | CCL11/CCL16/CCL18/CCL23/CCL8/CL5        | 6 |
| G0:0060326 | cell chemotaxis                                      | 7/40 | 240/16672 | 1.46E-06 | 8.56E-05    | 7.23E-05    | CCL11/CCL16/CCL18/CCL23/CCL8/CL5/AZU1   | 7 |
| G0:0050900 | leukocyte migration                                  | 8/40 | 362/16672 | 1.92E-06 | 0.000106108 | 8.96E-05    | APOB/CL11/CL16/CL18/CL23/CL8/CC L5/AZU1 | 8 |
| G0:0034341 | response to interferon-gamma                         | 6/40 | 159/16672 | 2.01E-06 | 0.000106108 | 8.96E-05    | CCL11/CCL16/CCL18/CCL23/CCL8/CL5        | 6 |
| G0:0032103 | positive regulation of response to external stimulus | 7/40 | 261/16672 | 2.55E-06 | 0.000128219 | 0.000108255 | CCL11/CCL16/CCL18/CCL23/CCL8/CL5/AZU1   | 7 |
| G0:007     | positi                                               | 6/40 | 170/16672 | 2.96E-   | 0.0001      | 0.0001      | CCL11/                                  | 6 |

|                |                                                                  |      |               |                 |                 |                 |                                                       |   |
|----------------|------------------------------------------------------------------|------|---------------|-----------------|-----------------|-----------------|-------------------------------------------------------|---|
| 0374           | ve<br>regula<br>tion of<br>ERK1<br>and<br>ERK2<br>cascad<br>e    |      | 672           | 06              | 42233           | 20087           | CCL16/<br>CCL18/<br>CCL23/<br>CCL8/C<br>CL5           |   |
| GO:007<br>0372 | regula<br>tion of<br>ERK1<br>and<br>ERK2<br>cascad<br>e          | 6/40 | 237/16<br>672 | 1.98E-<br>05    | 0.0009<br>10875 | 0.0007<br>6905  | CCL11/<br>CCL16/<br>CCL18/<br>CCL23/<br>CCL8/C<br>CL5 | 6 |
| GO:007<br>0371 | ERK1<br>and<br>ERK2<br>cascad<br>e                               | 6/40 | 251/16<br>672 | 2.74E-<br>05    | 0.0012<br>06168 | 0.0010<br>18366 | CCL11/<br>CCL16/<br>CCL18/<br>CCL23/<br>CCL8/C<br>CL5 | 6 |
| GO:005<br>0727 | regula<br>tion of<br>inflam<br>matory<br>respon<br>se            | 6/40 | 295/16<br>672 | 6.75E-<br>05    | 0.0028<br>50541 | 0.0024<br>06707 | CCL11/<br>CCL16/<br>CCL18/<br>CCL23/<br>CCL8/C<br>CL5 | 6 |
| GO:005<br>0918 | positi<br>ve<br>chemot<br>axis                                   | 3/40 | 52/166<br>72  | 0.0002<br>60624 | 0.0105<br>85327 | 0.0089<br>37173 | CCL16/<br>CCL5/A<br>ZU1                               | 3 |
| GO:004<br>8245 | eosino<br>phil<br>chemot<br>axis                                 | 2/40 | 11/166<br>72  | 0.0003<br>04507 | 0.0119<br>09597 | 0.0100<br>55252 | CCL11/<br>CCL5                                        | 2 |
| GO:003<br>1349 | positi<br>ve<br>regula<br>tion of<br>defens<br>e<br>respon<br>se | 6/40 | 396/16<br>672 | 0.0003<br>34988 | 0.0126<br>3385  | 0.0106<br>66738 | CCL11/<br>CCL16/<br>CCL18/<br>CCL23/<br>CCL8/C<br>CL5 | 6 |
| GO:007         | eosino                                                           | 2/40 | 15/166        | 0.0005          | 0.0210          | 0.0177          | CCL11/                                                | 2 |

|                |                                                                   |      |               |                 |                 |                 |                                                       |   |
|----------------|-------------------------------------------------------------------|------|---------------|-----------------|-----------------|-----------------|-------------------------------------------------------|---|
| 2677           | phil<br>migrat<br>ion                                             |      | 72            | 77811           | 40279           | 64271           | CCL5                                                  |   |
| G0:000<br>9615 | respon<br>se to<br>virus                                          | 5/40 | 304/16<br>672 | 0.0007<br>60625 | 0.0267<br>7399  | 0.0226<br>05232 | APOB/C<br>CL11/C<br>CL8/CC<br>L5/AZU<br>1             | 5 |
| G0:004<br>3410 | positi<br>ve<br>regula<br>tion of<br>MAPK<br>cascad<br>e          | 6/40 | 471/16<br>672 | 0.0008<br>36228 | 0.0284<br>85689 | 0.0240<br>50418 | CCL11/<br>CCL16/<br>CCL18/<br>CCL23/<br>CCL8/C<br>CL5 | 6 |
| G0:000<br>2544 | chroni<br>c<br>inflam<br>matory<br>respon<br>se                   | 2/40 | 22/166<br>72  | 0.0012<br>57754 | 0.0415<br>05871 | 0.0350<br>43334 | CCL11/<br>CCL5                                        | 2 |
| G0:004<br>8246 | macrop<br>hage<br>chemot<br>axis                                  | 2/40 | 26/166<br>72  | 0.0017<br>58868 | 0.0562<br>83782 | 0.0475<br>20299 | CCL5/A<br>ZU1                                         | 2 |
| G0:000<br>6874 | cellul<br>ar<br>calciu<br>m ion<br>homeos<br>tasis                | 5/40 | 370/16<br>672 | 0.0018<br>20676 | 0.0565<br>4805  | 0.0477<br>43419 | CCL11/<br>CCL23/<br>CCL8/C<br>CL5/JP<br>H3            | 5 |
| G0:005<br>5074 | calciu<br>m ion<br>homeos<br>tasis                                | 5/40 | 383/16<br>672 | 0.0021<br>17117 | 0.0638<br>7644  | 0.0539<br>30766 | CCL11/<br>CCL23/<br>CCL8/C<br>CL5/JP<br>H3            | 5 |
| G0:007<br>2503 | cellul<br>ar<br>divale<br>nt<br>inorga<br>nic<br>cation<br>homeos | 5/40 | 395/16<br>672 | 0.0024<br>2086  | 0.0710<br>11885 | 0.0599<br>5521  | CCL11/<br>CCL23/<br>CCL8/C<br>CL5/JP<br>H3            | 5 |



|                |                                       |      |           |             |             |             |                                            |   |
|----------------|---------------------------------------|------|-----------|-------------|-------------|-------------|--------------------------------------------|---|
|                | tasis                                 |      |           |             |             |             |                                            |   |
| G0:004<br>5766 | positive regulation of angiogenesis   | 3/40 | 120/16672 | 0.002958989 | 0.083262848 | 0.070298676 | CCL11/LRG1/B<br>RCA1                       | 3 |
| G0:007<br>2507 | divalent inorganic cation homeostasis | 5/40 | 415/16672 | 0.002996201 | 0.083262848 | 0.070298676 | CCL11/<br>CCL23/<br>CCL8/C<br>CL5/JP<br>H3 | 5 |

**S6 Table. The GO term pathways enriched by DSGs.**

| Pathway ID     | Description                         | Gene Ratio | BgRatio  | pvalue      | p.adjust    | qvalue      | geneID                             | Count |
|----------------|-------------------------------------|------------|----------|-------------|-------------|-------------|------------------------------------|-------|
| G0:000<br>7212 | dopamine receptor signaling pathway | 4/43       | 37/16672 | 2.38E-06    | 0.002402473 | 0.001887291 | PALM/G<br>NA15/G<br>NA11/K<br>LF16 | 4     |
| G0:000<br>3009 | skeletal muscle contraction         | 3/43       | 38/16672 | 0.000126592 | 0.041598317 | 0.032678037 | EEF2/T<br>CAP/MY<br>H8             | 3     |
| G0:005<br>0879 | multicellular organismal movement   | 3/43       | 47/16672 | 0.000239423 | 0.041598317 | 0.032678037 | EEF2/T<br>CAP/MY<br>H8             | 3     |
| G0:005<br>0881 | musculoskeletal movement            | 3/43       | 47/16672 | 0.000239423 | 0.041598317 | 0.032678037 | EEF2/T<br>CAP/MY<br>H8             | 3     |
| G0:006         | trabec                              | 3/43       | 48/16672 | 0.0002      | 0.0415      | 0.0326      | MED1/S                             | 3     |

|            |                                                                |      |           |             |             |             |                                |   |
|------------|----------------------------------------------------------------|------|-----------|-------------|-------------|-------------|--------------------------------|---|
| 1383       | ulamorphogenesis                                               |      | 72        | 54926       | 98317       | 78037       | BN02/UBE4B                     |   |
| G0:0006352 | DNA-templated transcription, initiation                        | 5/43 | 228/16672 | 0.000288531 | 0.041598317 | 0.032678037 | MED1/MED16/POLR2E/MED24/POLRMT | 5 |
| G0:0060158 | phospholipase C-activating dopamine receptor signaling pathway | 2/43 | 10/16672  | 0.000288591 | 0.041598317 | 0.032678037 | GNA15/GNA11                    | 2 |
| G0:0035747 | natural killer cell chemotaxis                                 | 2/43 | 11/16672  | 0.000352145 | 0.044414239 | 0.034890117 | CCL7/CCL4                      | 2 |
| G0:0010839 | negative regulation of keratinocyte proliferation              | 2/43 | 13/16672  | 0.000497771 | 0.048427142 | 0.0380425   | MED1/KDF1                      | 2 |
| G0:0030521 | androgen receptor                                              | 3/43 | 62/16672  | 0.0005436   | 0.048427142 | 0.0380425   | MED1/MED16/MED24               | 3 |

|                |                                                                             |      |               |                 |                 |               |                                                       |   |
|----------------|-----------------------------------------------------------------------------|------|---------------|-----------------|-----------------|---------------|-------------------------------------------------------|---|
|                | signal<br>ing<br>pathwa<br>y                                                |      |               |                 |                 |               |                                                       |   |
| G0:005<br>5008 | cardia<br>c<br>muscle<br>tissue<br>morpho<br>genesi<br>s                    | 3/43 | 62/166<br>72  | 0.0005<br>436   | 0.0484<br>27142 | 0.0380<br>425 | MED1/T<br>CAP/UB<br>E4B                               | 3 |
| G0:000<br>9314 | respon<br>se to<br>radiat<br>ion                                            | 6/43 | 421/16<br>672 | 0.0006<br>91344 | 0.0484<br>27142 | 0.0380<br>425 | PPP1R1<br>B/CCL7<br>/GNA11<br>/MYC/E<br>CT2/UB<br>E4B | 6 |
| G0:005<br>0678 | regula<br>tion of<br>epithe<br>lial<br>cell<br>prolif<br>eratio<br>n        | 5/43 | 281/16<br>672 | 0.0007<br>48148 | 0.0484<br>27142 | 0.0380<br>425 | MED1/P<br>DCD10/<br>MYDGF/<br>MYC/KD<br>F1            | 5 |
| G0:000<br>3222 | ventri<br>cular<br>trabec<br>ula<br>myocar<br>dium<br>morpho<br>genesi<br>s | 2/43 | 16/166<br>72  | 0.0007<br>62048 | 0.0484<br>27142 | 0.0380<br>425 | MED1/U<br>BE4B                                        | 2 |
| G0:006<br>0415 | muscle<br>tissue<br>morpho<br>genesi<br>s                                   | 3/43 | 72/166<br>72  | 0.0008<br>41995 | 0.0484<br>27142 | 0.0380<br>425 | MED1/T<br>CAP/UB<br>E4B                               | 3 |
| G0:000<br>7213 | G-prot<br>ein<br>couple<br>d<br>acetyl                                      | 2/43 | 18/166<br>72  | 0.0009<br>68435 | 0.0484<br>27142 | 0.0380<br>425 | GNA15/<br>GNA11                                       | 2 |

|                |                                                                                                      |      |               |                 |                 |               |                                     |   |
|----------------|------------------------------------------------------------------------------------------------------|------|---------------|-----------------|-----------------|---------------|-------------------------------------|---|
|                | cholin<br>e<br>recept<br>or<br>signal<br>ing<br>pathwa<br>y                                          |      |               |                 |                 |               |                                     |   |
| G0:009<br>5500 | acetyl<br>cholin<br>e<br>recept<br>or<br>signal<br>ing<br>pathwa<br>y                                | 2/43 | 18/166<br>72  | 0.0009<br>68435 | 0.0484<br>27142 | 0.0380<br>425 | GNA15/<br>GNA11                     | 2 |
| G0:190<br>3831 | signal<br>transd<br>uction<br>involv<br>ed in<br>cellul<br>ar<br>respon<br>se to<br>ammoni<br>um ion | 2/43 | 18/166<br>72  | 0.0009<br>68435 | 0.0484<br>27142 | 0.0380<br>425 | GNA15/<br>GNA11                     | 2 |
| G0:190<br>5144 | respon<br>se to<br>acetyl<br>cholin<br>e                                                             | 2/43 | 18/166<br>72  | 0.0009<br>68435 | 0.0484<br>27142 | 0.0380<br>425 | GNA15/<br>GNA11                     | 2 |
| G0:190<br>5145 | cellul<br>ar<br>respon<br>se to<br>acetyl<br>cholin<br>e                                             | 2/43 | 18/166<br>72  | 0.0009<br>68435 | 0.0484<br>27142 | 0.0380<br>425 | GNA15/<br>GNA11                     | 2 |
| G0:000<br>6367 | transc<br>ription<br>initia                                                                          | 4/43 | 173/16<br>672 | 0.0010<br>07899 | 0.0484<br>27142 | 0.0380<br>425 | MED1/M<br>ED16/P<br>OLR2E/<br>MED24 | 4 |

|                |                                                                                       |      |               |                 |                 |                 |                                                               |   |
|----------------|---------------------------------------------------------------------------------------|------|---------------|-----------------|-----------------|-----------------|---------------------------------------------------------------|---|
|                | tion<br>from<br>RNA<br>polyme<br>rase II<br>promot<br>er                              |      |               |                 |                 |                 |                                                               |   |
| G0:004<br>8644 | muscle<br>organ<br>morpho<br>genesi<br>s                                              | 3/43 | 78/166<br>72  | 0.0010<br>62553 | 0.0487<br>32561 | 0.0382<br>82425 | MED1/T<br>CAP/UB<br>E4B                                       | 3 |
| G0:004<br>5606 | positi<br>ve<br>regula<br>tion of<br>epider<br>mal<br>cell<br>differ<br>entiat<br>ion | 2/43 | 20/166<br>72  | 0.0011<br>98702 | 0.0491<br>39845 | 0.0386<br>02372 | MED1/K<br>DF1                                                 | 2 |
| G0:190<br>1623 | regula<br>tion of<br>lympho<br>cyte<br>chemot<br>axis                                 | 2/43 | 20/166<br>72  | 0.0011<br>98702 | 0.0491<br>39845 | 0.0386<br>02372 | CCL7/C<br>CL4                                                 | 2 |
| G0:004<br>3410 | positi<br>ve<br>regula<br>tion of<br>MAPK<br>cascad<br>e                              | 6/43 | 471/16<br>672 | 0.0012<br>36736 | 0.0491<br>39845 | 0.0386<br>02372 | CCL7/P<br>DCD10/<br>PIK3R5<br>/GADD4<br>5B/MYD<br>GF/CCL<br>4 | 6 |
| G0:000<br>2573 | myeloi<br>d<br>leukoc<br>yte<br>differ<br>entiat<br>ion                               | 4/43 | 184/16<br>672 | 0.0012<br>6624  | 0.0491<br>39845 | 0.0386<br>02372 | MED1/F<br>STL3/M<br>YC/SBN<br>02                              | 4 |
| G0:007<br>1242 | cellul<br>ar                                                                          | 2/43 | 21/166<br>72  | 0.0013<br>22715 | 0.0494<br>30352 | 0.0388<br>30583 | GNA15/<br>GNA11                                               | 2 |

|                |                                                                      |      |               |                 |                 |                 |                                                         |   |
|----------------|----------------------------------------------------------------------|------|---------------|-----------------|-----------------|-----------------|---------------------------------------------------------|---|
|                | respon<br>se to<br>ammoni<br>um ion                                  |      |               |                 |                 |                 |                                                         |   |
| G0:006<br>0359 | respon<br>se to<br>ammoni<br>um ion                                  | 2/43 | 22/166<br>72  | 0.0014<br>52608 | 0.0523<br>45774 | 0.0411<br>20826 | GNA15/<br>GNA11                                         | 2 |
| G0:001<br>4706 | striat<br>ed<br>muscle<br>tissue<br>develo<br>pment                  | 5/43 | 329/16<br>672 | 0.0015<br>10638 | 0.0525<br>59774 | 0.0412<br>88936 | MED1/E<br>EF2/TC<br>AP/HMG<br>20B/UB<br>E4B             | 5 |
| G0:005<br>0878 | regula<br>tion of<br>body<br>fluid<br>levels                         | 6/43 | 495/16<br>672 | 0.0015<br>94166 | 0.0536<br>17128 | 0.0421<br>19553 | MED1/P<br>IK3R5/<br>GNA15/<br>GNA11/<br>HMG20B<br>/KDF1 | 6 |
| G0:005<br>0673 | epithe<br>lial<br>cell<br>prolif<br>eratio<br>n                      | 5/43 | 336/16<br>672 | 0.0016<br>57253 | 0.0539<br>4091  | 0.0423<br>73904 | MED1/P<br>DCD10/<br>MYDGF/<br>MYC/KD<br>F1              | 5 |
| G0:006<br>0537 | muscle<br>tissue<br>develo<br>pment                                  | 5/43 | 343/16<br>672 | 0.0018<br>14111 | 0.0557<br>10777 | 0.0437<br>64243 | MED1/E<br>EF2/TC<br>AP/HMG<br>20B/UB<br>E4B             | 5 |
| G0:000<br>7517 | muscle<br>organ<br>develo<br>pment                                   | 5/43 | 344/16<br>672 | 0.0018<br>3738  | 0.0557<br>10777 | 0.0437<br>64243 | MED1/E<br>EF2/TC<br>AP/HMG<br>20B/UB<br>E4B             | 5 |
| G0:200<br>0403 | positi<br>ve<br>regula<br>tion of<br>lympho<br>cyte<br>migrat<br>ion | 2/43 | 25/166<br>72  | 0.0018<br>77271 | 0.0557<br>10777 | 0.0437<br>64243 | CCL7/C<br>CL4                                           | 2 |

|                |                                                                         |      |              |                 |                 |                 |                            |   |
|----------------|-------------------------------------------------------------------------|------|--------------|-----------------|-----------------|-----------------|----------------------------|---|
| G0:000<br>7200 | phospholipase C-activating G-protein coupled receptor signaling pathway | 3/43 | 98/166<br>72 | 0.0020<br>49623 | 0.0590<br>87706 | 0.0464<br>17029 | KISS1R<br>/GNA15<br>/GNA11 | 3 |
| G0:001<br>0837 | regulation of keratinocyte proliferation                                | 2/43 | 29/166<br>72 | 0.0025<br>24017 | 0.0707<br>42591 | 0.0555<br>72658 | MED1/K<br>DF1              | 2 |
| G0:003<br>0224 | monocyte differentiation                                                | 2/43 | 31/166<br>72 | 0.0028<br>81378 | 0.0745<br>46413 | 0.0585<br>60794 | MED1/M<br>YC               | 2 |
| G0:006<br>0603 | mammary gland duct morphogenesis                                        | 2/43 | 31/166<br>72 | 0.0028<br>81378 | 0.0745<br>46413 | 0.0585<br>60794 | MED1/S<br>OSTDC1           | 2 |
| G0:190<br>3131 | mononuclear cell differentiation                                        | 2/43 | 31/166<br>72 | 0.0028<br>81378 | 0.0745<br>46413 | 0.0585<br>60794 | MED1/M<br>YC               | 2 |
| G0:004<br>5684 | positive regulation of epider                                           | 2/43 | 32/166<br>72 | 0.0030<br>68454 | 0.0774<br>01745 | 0.0608<br>03833 | MED1/K<br>DF1              | 2 |

|                |                                                                                                     |      |               |                 |                 |                 |                          |   |
|----------------|-----------------------------------------------------------------------------------------------------|------|---------------|-----------------|-----------------|-----------------|--------------------------|---|
|                | mis<br>develo<br>pment                                                                              |      |               |                 |                 |                 |                          |   |
| G0:005<br>0680 | negati<br>ve<br>regula<br>tion of<br>epithe<br>lial<br>cell<br>prolif<br>eratio<br>n                | 3/43 | 115/16<br>672 | 0.0032<br>27682 | 0.0783<br>43773 | 0.0615<br>43853 | MED1/P<br>DCD10/<br>KDF1 | 3 |
| G0:006<br>1384 | heart<br>trabec<br>ula<br>morpho<br>genesi<br>s                                                     | 2/43 | 33/166<br>72  | 0.0032<br>61089 | 0.0783<br>43773 | 0.0615<br>43853 | MED1/U<br>BE4B           | 2 |
| G0:004<br>2542 | respon<br>se to<br>hydrog<br>en<br>peroxi<br>de                                                     | 3/43 | 119/16<br>672 | 0.0035<br>5404  | 0.0833<br>95955 | 0.0655<br>12653 | PDCD10<br>/EEF2/<br>ECT2 | 3 |
| G0:003<br>0518 | intrac<br>ellula<br>r<br>steroi<br>d<br>hormon<br>e<br>recept<br>or<br>signal<br>ing<br>pathwa<br>y | 3/43 | 123/16<br>672 | 0.0038<br>99928 | 0.0894<br>32444 | 0.0702<br>54687 | MED1/M<br>ED16/M<br>ED24 | 3 |
| G0:200<br>0401 | regula<br>tion of<br>lympho<br>cyte<br>migrat<br>ion                                                | 2/43 | 38/166<br>72  | 0.0043<br>06651 | 0.0933<br>23089 | 0.0733<br>11028 | CCL7/C<br>CL4            | 2 |



|                |                                |      |           |             |             |             |                 |   |
|----------------|--------------------------------|------|-----------|-------------|-------------|-------------|-----------------|---|
| G0:007<br>1248 | cellular response to metal ion | 3/43 | 129/16672 | 0.004456151 | 0.093323089 | 0.073311028 | MT1M/FSTL3/ECT2 | 3 |
| G0:003<br>0049 | muscle filament sliding        | 2/43 | 39/16672  | 0.004532043 | 0.093323089 | 0.073311028 | TCAP/MYH8       | 2 |
| G0:003<br>3275 | actin-myosin filament sliding  | 2/43 | 39/16672  | 0.004532043 | 0.093323089 | 0.073311028 | TCAP/MYH8       | 2 |
| G0:004<br>3616 | keratinocyte proliferation     | 2/43 | 39/16672  | 0.004532043 | 0.093323089 | 0.073311028 | MED1/KDF1       | 2 |
| G0:005<br>1302 | regulation of cell division    | 3/43 | 132/16672 | 0.004751394 | 0.095883123 | 0.075322092 | MYC/ECT2/KDF1   | 3 |

**S7 Table. The pathways KEGG pathways enriched by DRGs.**

| Pathway ID | Description                            | Gene Ratio | BgRatio  | pvalue   | p.adjust    | qvalue      | geneID                        | Count |
|------------|----------------------------------------|------------|----------|----------|-------------|-------------|-------------------------------|-------|
| hsa04062   | Chemokine signaling pathway            | 6/19       | 182/7240 | 4.80E-06 | 0.000240129 | 0.000240129 | 6356/6360/6362/6368/6355/6352 | 6     |
| hsa04060   | Cytokine-cytokine receptor interaction | 6/19       | 270/7240 | 4.58E-05 | 0.001145446 | 0.001145446 | 6356/6360/6362/6368/6355/6352 | 6     |

|          |                                      |      |          |             |             |             |            |   |
|----------|--------------------------------------|------|----------|-------------|-------------|-------------|------------|---|
|          | ction                                |      |          |             |             |             |            |   |
| hsa05012 | Parkinson's disease                  | 2/19 | 142/7240 | 0.052536778 | 0.355317868 | 0.355317868 | 4711/6570  | 2 |
| hsa05224 | Breast cancer                        | 2/19 | 144/7240 | 0.053865778 | 0.355317868 | 0.355317868 | 672/27006  | 2 |
| hsa00514 | Other types of O-glycan biosynthesis | 1/19 | 22/7240  | 0.056250789 | 0.355317868 | 0.355317868 | 4242       | 1 |
| hsa03010 | Ribosome                             | 2/19 | 154/7240 | 0.060690862 | 0.355317868 | 0.355317868 | 6209/6143  | 2 |
| hsa04977 | Vitamin digestion and absorption     | 1/19 | 24/7240  | 0.061213071 | 0.355317868 | 0.355317868 | 338        | 1 |
| hsa04950 | Maturity onset diabetes of the young | 1/19 | 26/7240  | 0.066150627 | 0.355317868 | 0.355317868 | 6928       | 1 |
| hsa04621 | NOD-like receptor signaling pathway  | 2/19 | 168/7240 | 0.070723763 | 0.355317868 | 0.355317868 | 55669/6352 | 2 |
| hsa04744 | Phototransduction                    | 1/19 | 28/7240  | 0.071063574 | 0.355317868 | 0.355317868 | 5957       | 1 |
| hsa05310 | Asthma                               | 1/19 | 31/7240  | 0.078387105 | 0.356305023 | 0.356305023 | 6356       | 1 |
| hsa05020 | Prion disease                        | 1/19 | 35/7240  | 0.088066759 | 0.362050403 | 0.362050403 | 6352       | 1 |

|          |                               |      |         |             |             |             |       |   |
|----------|-------------------------------|------|---------|-------------|-------------|-------------|-------|---|
|          | es                            |      |         |             |             |             |       |   |
| hsa03440 | Homologous recombination      | 1/19 | 41/7240 | 0.102405834 | 0.362050403 | 0.362050403 | 672   | 1 |
| hsa04975 | Fat digestion and absorption  | 1/19 | 41/7240 | 0.102405834 | 0.362050403 | 0.362050403 | 338   | 1 |
| hsa04330 | Notch signaling pathway       | 1/19 | 48/7240 | 0.118864779 | 0.362050403 | 0.362050403 | 4242  | 1 |
| hsa05030 | Cocaine addiction             | 1/19 | 49/7240 | 0.121192583 | 0.362050403 | 0.362050403 | 6570  | 1 |
| hsa03460 | Fanconi anemia pathway        | 1/19 | 55/7240 | 0.135037528 | 0.362050403 | 0.362050403 | 672   | 1 |
| hsa04721 | Synaptic vesicle cycle        | 1/19 | 63/7240 | 0.153176258 | 0.362050403 | 0.362050403 | 6570  | 1 |
| hsa04623 | Cytosolic DNA-sensing pathway | 1/19 | 64/7240 | 0.155418093 | 0.362050403 | 0.362050403 | 6352  | 1 |
| hsa04137 | Mitophagy - animal            | 1/19 | 65/7240 | 0.157654305 | 0.362050403 | 0.362050403 | 55669 | 1 |
| hsa05031 | Amphetamine addiction         | 1/19 | 68/7240 | 0.164329334 | 0.362050403 | 0.362050403 | 6570  | 1 |
| hsa05120 | Epithelial                    | 1/19 | 68/7240 | 0.164329334 | 0.362050403 | 0.362050403 | 6352  | 1 |

|          |                                                 |      |          |             |             |             |           |   |
|----------|-------------------------------------------------|------|----------|-------------|-------------|-------------|-----------|---|
|          | cell signaling in Helicobacter pylori infection |      |          |             |             |             |           |   |
| hsa05218 | Melanoma                                        | 1/19 | 69/7240  | 0.166543185 | 0.362050403 | 0.362050403 | 27006     | 1 |
| hsa01524 | Platinum drug resistance                        | 1/19 | 73/7240  | 0.175343153 | 0.365298235 | 0.365298235 | 672       | 1 |
| hsa04911 | Insulin secretion                               | 1/19 | 85/7240  | 0.201217945 | 0.40103239  | 0.40103239  | 27094     | 1 |
| hsa05323 | Rheumatoid arthritis                            | 1/19 | 90/7240  | 0.211770473 | 0.40103239  | 0.40103239  | 6352      | 1 |
| hsa04657 | IL-17 signaling pathway                         | 1/19 | 93/7240  | 0.218038452 | 0.40103239  | 0.40103239  | 6356      | 1 |
| hsa04151 | PI3K-Akt signaling pathway                      | 2/19 | 342/7240 | 0.225536145 | 0.40103239  | 0.40103239  | 672/27006 | 2 |
| hsa05142 | Chagas disease (American trypanosomiasis)       | 1/19 | 102/7240 | 0.236560296 | 0.40103239  | 0.40103239  | 6352      | 1 |
| hsa04620 | Toll-like receptor                              | 1/19 | 104/7240 | 0.240619434 | 0.40103239  | 0.40103239  | 6352      | 1 |

|              |                                                                    |      |              |                 |                 |                 |       |   |
|--------------|--------------------------------------------------------------------|------|--------------|-----------------|-----------------|-----------------|-------|---|
|              | or<br>signal<br>ing<br>pathwa<br>y                                 |      |              |                 |                 |                 |       |   |
| hsa046<br>68 | TNF<br>signal<br>ing<br>pathwa<br>y                                | 1/19 | 108/72<br>40 | 0.2486<br>76451 | 0.4010<br>91051 | 0.4010<br>91051 | 6352  | 1 |
| hsa047<br>26 | Seroto<br>nergic<br>synaps<br>e                                    | 1/19 | 113/72<br>40 | 0.2586<br>33864 | 0.4041<br>15412 | 0.4041<br>15412 | 6570  | 1 |
| hsa042<br>70 | Vascul<br>ar<br>smooth<br>muscle<br>contra<br>ction                | 1/19 | 121/72<br>40 | 0.2743<br>06115 | 0.4156<br>15326 | 0.4156<br>15326 | 27094 | 1 |
| hsa047<br>28 | Dopami<br>nergic<br>synaps<br>e                                    | 1/19 | 130/72<br>40 | 0.2915<br>62105 | 0.4232<br>13772 | 0.4232<br>13772 | 6570  | 1 |
| hsa001<br>90 | Oxidat<br>ive<br>phosph<br>orylat<br>ion                           | 1/19 | 133/72<br>40 | 0.2972<br>27196 | 0.4232<br>13772 | 0.4232<br>13772 | 4711  | 1 |
| hsa041<br>20 | Ubiqui<br>tin<br>mediat<br>ed<br>proteo<br>lysis                   | 1/19 | 137/72<br>40 | 0.3047<br>13916 | 0.4232<br>13772 | 0.4232<br>13772 | 672   | 1 |
| hsa049<br>32 | Non-al<br>coholi<br>c fatty<br>liver<br>diseas<br>e<br>(NAFLD<br>) | 1/19 | 149/72<br>40 | 0.3267<br>23345 | 0.4415<br>18034 | 0.4415<br>18034 | 4711  | 1 |
| hsa040       | cGMP-P                                                             | 1/19 | 163/72       | 0.3515          | 0.4497          | 0.4497          | 27094 | 1 |

|          |                                  |      |              |                 |                 |                 |       |   |
|----------|----------------------------------|------|--------------|-----------------|-----------------|-----------------|-------|---|
| 22       | KG signaling pathway             |      | 40           | 6672            | 28714           | 28714           |       |   |
| hsa04530 | Tight junction                   | 1/19 | 170/72<br>40 | 0.3636<br>60278 | 0.4497<br>28714 | 0.4497<br>28714 | 4620  | 1 |
| hsa05010 | Alzheimer's disease              | 1/19 | 171/72<br>40 | 0.3653<br>70385 | 0.4497<br>28714 | 0.4497<br>28714 | 4711  | 1 |
| hsa05164 | Influenza A                      | 1/19 | 173/72<br>40 | 0.3687<br>77545 | 0.4497<br>28714 | 0.4497<br>28714 | 6352  | 1 |
| hsa05034 | Alcoholism                       | 1/19 | 180/72<br>40 | 0.3805<br>66645 | 0.4521<br>62082 | 0.4521<br>62082 | 6570  | 1 |
| hsa05168 | Herpes simplex infection         | 1/19 | 185/72<br>40 | 0.3888<br>59391 | 0.4521<br>62082 | 0.4521<br>62082 | 6352  | 1 |
| hsa05016 | Huntington's disease             | 1/19 | 193/72<br>40 | 0.4019<br>09386 | 0.4567<br>15212 | 0.4567<br>15212 | 4711  | 1 |
| hsa04015 | Rap1 signaling pathway           | 1/19 | 210/72<br>40 | 0.4287<br>69386 | 0.4694<br>05614 | 0.4694<br>05614 | 27006 | 1 |
| hsa04810 | Regulation of actin cytoskeleton | 1/19 | 212/72<br>40 | 0.4318<br>53165 | 0.4694<br>05614 | 0.4694<br>05614 | 27006 | 1 |
| hsa04014 | Ras signaling pathway            | 1/19 | 227/72<br>40 | 0.4544<br>83883 | 0.4834<br>93493 | 0.4834<br>93493 | 27006 | 1 |
| hsa04010 | MAPK signaling pathway           | 1/19 | 255/72<br>40 | 0.4944<br>61866 | 0.5150<br>64444 | 0.5150<br>64444 | 27006 | 1 |

|          |                     |      |          |             |             |             |       |   |
|----------|---------------------|------|----------|-------------|-------------|-------------|-------|---|
|          | y                   |      |          |             |             |             |       |   |
| hsa05206 | MicroRNAs in cancer | 1/19 | 299/7240 | 0.551726105 | 0.562985821 | 0.562985821 | 672   | 1 |
| hsa05200 | Pathways in cancer  | 1/19 | 395/7240 | 0.656070145 | 0.656070145 | 0.656070145 | 27006 | 1 |

**S8 Table. The pathways KEGG pathways enriched by DSGs.**

| Pathway ID | Description                               | Gene Ratio | BgRatio  | pvalue      | p.adjust    | qvalue      | geneID               | Count |
|------------|-------------------------------------------|------------|----------|-------------|-------------|-------------|----------------------|-------|
| hsa04919   | Thyroid hormone signaling pathway         | 4/23       | 116/7240 | 0.000437833 | 0.032837463 | 0.031339614 | 5469/10025/9862/4609 | 4     |
| hsa04210   | Apoptosis                                 | 3/23       | 138/7240 | 0.009077066 | 0.340389971 | 0.324863411 | 4616/8743/84823      | 3     |
| hsa04623   | Cytosolic DNA-sensing pathway             | 2/23       | 64/7240  | 0.017271045 | 0.431776126 | 0.412081074 | 5434/6351            | 2     |
| hsa04064   | NF-kappa B signaling pathway              | 2/23       | 95/7240  | 0.036047657 | 0.445087718 | 0.424785471 | 4616/6351            | 2     |
| hsa05146   | Amoebiasis                                | 2/23       | 96/7240  | 0.036744397 | 0.445087718 | 0.424785471 | 2769/2767            | 2     |
| hsa05142   | Chagas disease (American trypanosomiasis) | 2/23       | 102/7240 | 0.041034096 | 0.445087718 | 0.424785471 | 2769/2767            | 2     |

|          |                                        |      |          |             |             |             |                |   |
|----------|----------------------------------------|------|----------|-------------|-------------|-------------|----------------|---|
|          | sis)                                   |      |          |             |             |             |                |   |
| hsa04725 | Cholinergic synapse                    | 2/23 | 112/7240 | 0.048583264 | 0.445087718 | 0.424785471 | 23533/2767     | 2 |
| hsa04060 | Cytokine-cytokine receptor interaction | 3/23 | 270/7240 | 0.052369957 | 0.445087718 | 0.424785471 | 6354/6351/8743 | 3 |
| hsa04110 | Cell cycle                             | 2/23 | 124/7240 | 0.058258204 | 0.445087718 | 0.424785471 | 4616/4609      | 2 |
| hsa04068 | FoxO signaling pathway                 | 2/23 | 132/7240 | 0.065054322 | 0.445087718 | 0.424785471 | 4616/8743      | 2 |
| hsa04120 | Ubiquitin mediated proteolysis         | 2/23 | 137/7240 | 0.069433695 | 0.445087718 | 0.424785471 | 997/10277      | 2 |
| hsa04310 | Wnt signaling pathway                  | 2/23 | 143/7240 | 0.074816192 | 0.445087718 | 0.424785471 | 4609/79718     | 2 |
| hsa04921 | Oxytocin signaling pathway             | 2/23 | 153/7240 | 0.084078467 | 0.445087718 | 0.424785471 | 23533/1938     | 2 |
| hsa05216 | Thyroid cancer                         | 1/23 | 29/7240  | 0.088307851 | 0.445087718 | 0.424785471 | 4609           | 1 |
| hsa04022 | cGMP-PKG signaling pathway             | 2/23 | 163/7240 | 0.093679605 | 0.445087718 | 0.424785471 | 23533/2767     | 2 |



|          |                                         |      |          |             |             |             |           |   |
|----------|-----------------------------------------|------|----------|-------------|-------------|-------------|-----------|---|
|          | y                                       |      |          |             |             |             |           |   |
| hsa03020 | RNA polymerase                          | 1/23 | 32/720   | 0.09700498  | 0.445087718 | 0.424785471 | 5434      | 1 |
| hsa05202 | Transcriptional misregulation in cancer | 2/23 | 180/7240 | 0.110700191 | 0.445087718 | 0.424785471 | 4609/8444 | 2 |
| hsa04020 | Calcium signaling pathway               | 2/23 | 182/7240 | 0.112755555 | 0.445087718 | 0.424785471 | 2769/2767 | 2 |
| hsa04062 | Chemokine signaling pathway             | 2/23 | 182/7240 | 0.112755555 | 0.445087718 | 0.424785471 | 6354/6351 | 2 |
| hsa05219 | Bladder cancer                          | 1/23 | 41/7240  | 0.122622775 | 0.459835406 | 0.438860458 | 4609      | 1 |
| hsa05169 | Epstein-Barr virus infection            | 2/23 | 203/7240 | 0.134928902 | 0.459926404 | 0.438947305 | 5434/4609 | 2 |
| hsa05030 | Cocaine addiction                       | 1/23 | 49/7240  | 0.144809258 | 0.459926404 | 0.438947305 | 84152     | 1 |
| hsa05213 | Endometrial cancer                      | 1/23 | 50/7240  | 0.147544536 | 0.459926404 | 0.438947305 | 4609      | 1 |
| hsa04978 | Mineral absorption                      | 1/23 | 51/7240  | 0.150271445 | 0.459926404 | 0.438947305 | 4499      | 1 |
| hsa05221 | Acute myeloid                           | 1/23 | 55/7240  | 0.161095875 | 0.459926404 | 0.438947305 | 4609      | 1 |

|              |                                                      |      |              |                 |                 |                 |               |   |
|--------------|------------------------------------------------------|------|--------------|-----------------|-----------------|-----------------|---------------|---|
|              | d<br>leukem<br>ia                                    |      |              |                 |                 |                 |               |   |
| hsa003<br>10 | Lysine<br>degrad<br>ation                            | 1/23 | 59/724<br>0  | 0.1717<br>88338 | 0.4599<br>26404 | 0.4389<br>47305 | 84444         | 1 |
| hsa047<br>30 | Long-t<br>erm<br>depres<br>sion                      | 1/23 | 60/724<br>0  | 0.1744<br>41014 | 0.4599<br>26404 | 0.4389<br>47305 | 2767          | 1 |
| hsa052<br>10 | Colore<br>ctal<br>cancer                             | 1/23 | 60/724<br>0  | 0.1744<br>41014 | 0.4599<br>26404 | 0.4389<br>47305 | 4609          | 1 |
| hsa052<br>30 | Centra<br>l<br>carbon<br>metabo<br>lism in<br>cancer | 1/23 | 65/724<br>0  | 0.1875<br>8295  | 0.4599<br>26404 | 0.4389<br>47305 | 4609          | 1 |
| hsa040<br>10 | MAPK<br>signal<br>ing<br>pathwa<br>y                 | 2/23 | 255/72<br>40 | 0.1934<br>19416 | 0.4599<br>26404 | 0.4389<br>47305 | 4616/4<br>609 | 2 |
| hsa050<br>31 | Amphet<br>amine<br>addict<br>ion                     | 1/23 | 68/724<br>0  | 0.1953<br>71806 | 0.4599<br>26404 | 0.4389<br>47305 | 84152         | 1 |
| hsa041<br>15 | p53<br>signal<br>ing<br>pathwa<br>y                  | 1/23 | 69/724<br>0  | 0.1979<br>5218  | 0.4599<br>26404 | 0.4389<br>47305 | 4616          | 1 |
| hsa052<br>20 | Chroni<br>c<br>myeloi<br>d<br>leukem<br>ia           | 1/23 | 71/724<br>0  | 0.2030<br>89204 | 0.4599<br>26404 | 0.4389<br>47305 | 4609          | 1 |
| hsa049<br>25 | Aldost<br>erone<br>synthe<br>sis and<br>secret       | 1/23 | 82/724<br>0  | 0.2307<br>8504  | 0.4599<br>26404 | 0.4389<br>47305 | 2767          | 1 |

|          |                            |      |          |             |             |             |      |   |
|----------|----------------------------|------|----------|-------------|-------------|-------------|------|---|
|          | ion                        |      |          |             |             |             |      |   |
| hsa04350 | TGF-beta signaling pathway | 1/23 | 84/7240  | 0.235720707 | 0.459926404 | 0.438947305 | 4609 | 1 |
| hsa05222 | Small cell lung cancer     | 1/23 | 84/7240  | 0.235720707 | 0.459926404 | 0.438947305 | 4609 | 1 |
| hsa04911 | Insulin secretion          | 1/23 | 85/7240  | 0.238177166 | 0.459926404 | 0.438947305 | 2767 | 1 |
| hsa04012 | ErbB signaling pathway     | 1/23 | 86/7240  | 0.240626073 | 0.459926404 | 0.438947305 | 4609 | 1 |
| hsa05132 | Salmonella infection       | 1/23 | 86/7240  | 0.240626073 | 0.459926404 | 0.438947305 | 6351 | 1 |
| hsa04540 | Gap junction               | 1/23 | 88/7240  | 0.245501315 | 0.459926404 | 0.438947305 | 2767 | 1 |
| hsa04912 | GnRH signaling pathway     | 1/23 | 92/7240  | 0.255162134 | 0.459926404 | 0.438947305 | 2767 | 1 |
| hsa04657 | IL-17 signaling pathway    | 1/23 | 93/7240  | 0.257558786 | 0.459926404 | 0.438947305 | 6354 | 1 |
| hsa01522 | Endocrine resistance       | 1/23 | 96/7240  | 0.264704566 | 0.460504114 | 0.439498663 | 5469 | 1 |
| hsa04620 | Toll-like recept           | 1/23 | 104/7240 | 0.283439793 | 0.460504114 | 0.439498663 | 6351 | 1 |

|          |                                     |      |          |             |             |             |            |   |
|----------|-------------------------------------|------|----------|-------------|-------------|-------------|------------|---|
|          | or signaling pathway                |      |          |             |             |             |            |   |
| hsa00240 | Pyrimidine metabolism               | 1/23 | 105/7240 | 0.285749334 | 0.460504114 | 0.439498663 | 5434       | 1 |
| hsa04151 | PI3K-Akt signaling pathway          | 2/23 | 342/7240 | 0.296744965 | 0.460504114 | 0.439498663 | 23533/4609 | 2 |
| hsa05145 | Toxoplasmosis                       | 1/23 | 113/7240 | 0.303971052 | 0.460504114 | 0.439498663 | 23533      | 1 |
| hsa04152 | AMPK signaling pathway              | 1/23 | 121/7240 | 0.32174762  | 0.460504114 | 0.439498663 | 1938       | 1 |
| hsa04270 | Vascular smooth muscle contraction  | 1/23 | 121/7240 | 0.32174762  | 0.460504114 | 0.439498663 | 2767       | 1 |
| hsa04611 | Platelet activation                 | 1/23 | 123/7240 | 0.32612343  | 0.460504114 | 0.439498663 | 23533      | 1 |
| hsa04728 | Dopaminergic synapse                | 1/23 | 130/7240 | 0.341227097 | 0.460504114 | 0.439498663 | 84152      | 1 |
| hsa04650 | Natural killer cell mediated cytoto | 1/23 | 133/7240 | 0.347600486 | 0.460504114 | 0.439498663 | 8743       | 1 |

|          |                                                          |      |          |             |             |             |           |   |
|----------|----------------------------------------------------------|------|----------|-------------|-------------|-------------|-----------|---|
|          | xicity                                                   |      |          |             |             |             |           |   |
| hsa03040 | Spliceosome                                              | 1/23 | 134/7240 | 0.349711812 | 0.460504114 | 0.439498663 | 8175      | 1 |
| hsa05162 | Measles                                                  | 1/23 | 134/7240 | 0.349711812 | 0.460504114 | 0.439498663 | 8743      | 1 |
| hsa04371 | Apelin signaling pathway                                 | 1/23 | 138/7240 | 0.35809194  | 0.460504114 | 0.439498663 | 23533     | 1 |
| hsa05200 | Pathways in cancer                                       | 2/23 | 395/7240 | 0.359727345 | 0.460504114 | 0.439498663 | 2767/4609 | 2 |
| hsa04550 | Signaling pathways regulating pluripotency of stem cells | 1/23 | 139/7240 | 0.360170774 | 0.460504114 | 0.439498663 | 4609      | 1 |
| hsa04261 | Adrenergic signaling in cardiomyocytes                   | 1/23 | 144/7240 | 0.370468721 | 0.460504114 | 0.439498663 | 23533     | 1 |
| hsa05161 | Hepatitis B                                              | 1/23 | 144/7240 | 0.370468721 | 0.460504114 | 0.439498663 | 4609      | 1 |
| hsa05224 | Breast cancer                                            | 1/23 | 144/7240 | 0.370468721 | 0.460504114 | 0.439498663 | 4609      | 1 |
| hsa04072 | Phospholipase D signaling pathway                        | 1/23 | 146/7240 | 0.374543346 | 0.460504114 | 0.439498663 | 23533     | 1 |
| hsa04390 | Hippo signaling                                          | 1/23 | 154/7240 | 0.390591002 | 0.4696916   | 0.448267071 | 4609      | 1 |

|          |                                             |      |          |             |             |             |       |   |
|----------|---------------------------------------------|------|----------|-------------|-------------|-------------|-------|---|
|          | pathway                                     |      |          |             |             |             |       |   |
| hsa04630 | Jak-STAT signaling pathway                  | 1/23 | 156/7240 | 0.394540944 | 0.4696916   | 0.448267071 | 4609  | 1 |
| hsa04141 | Protein processing in endoplasmic reticulum | 1/23 | 166/7240 | 0.413926109 | 0.482310396 | 0.460310273 | 10277 | 1 |
| hsa04530 | Tight junction                              | 1/23 | 170/7240 | 0.421512726 | 0.482310396 | 0.460310273 | 4626  | 1 |
| hsa05164 | Influenza A                                 | 1/23 | 173/7240 | 0.427140947 | 0.482310396 | 0.460310273 | 8743  | 1 |
| hsa00230 | Purine metabolism                           | 1/23 | 175/7240 | 0.430863954 | 0.482310396 | 0.460310273 | 5434  | 1 |
| hsa05034 | Alcoholism                                  | 1/23 | 180/7240 | 0.44007049  | 0.485371864 | 0.463232095 | 84152 | 1 |
| hsa05168 | Herpes simplex infection                    | 1/23 | 185/7240 | 0.449134473 | 0.488189645 | 0.465921345 | 997   | 1 |
| hsa05016 | Huntington's disease                        | 1/23 | 193/7240 | 0.463345587 | 0.4964417   | 0.473796991 | 5434  | 1 |
| hsa04024 | cAMP signaling pathway                      | 1/23 | 198/7240 | 0.472048725 | 0.498643019 | 0.475897899 | 84152 | 1 |
| hsa05205 | Proteoglycans in cancer                     | 1/23 | 203/7240 | 0.480616762 | 0.50064246  | 0.477806137 | 4609  | 1 |

|          |                                         |      |          |             |             |             |       |   |
|----------|-----------------------------------------|------|----------|-------------|-------------|-------------|-------|---|
| hsa05166 | HTLV-I infection                        | 1/23 | 256/7240 | 0.563632079 | 0.579074054 | 0.55266015  | 4609  | 1 |
| hsa04080 | Neuroactive ligand-receptor interaction | 1/23 | 278/7240 | 0.594222349 | 0.602252381 | 0.57478122  | 84634 | 1 |
| hsa05206 | MicroRNAs in cancer                     | 1/23 | 299/7240 | 0.621500896 | 0.621500896 | 0.593151732 | 4609  | 1 |
